# Supplementary material for: Xylosylated Detoxification of the Rice Flavonoid Phytoalexin Sakuranetin by the Rice Sheath Blight Fungus Rhizoctonia solani
Source: PubMed Central journal article supplement (PMC6017487; doi:10.3390/molecules23020276), 2018-01-29
Supplement: molecules-23-00276-s001.pdf [file molecules-23-00276-s001.pdf]

Supplementary Materials

# Xylosylated Detoxification of the Rice Flavonoid Phytoalexin Sakuranetin by the Rice Sheath Blight Fungus *Rhizoctonia solani*

Shun Katsumata, Hiroaki Toshima and Morifumi Hasegawa

**Figure S1.** Total ion current chromatograms obtained from the *Rhizoctonia solani* suspension culture without sakuranetin (**1**) and of the medium containing **1** without the fungus using LC-MS.

**Figure S2.** ESI-MS of peak I ( $t_r$  17.4 min) and peak III ( $t_r$  20.5 min) from the LC-MS analysis of the *Rhizoctonia solani* suspension culture containing sakuranetin (**1**).

**Figure S3.** GC-MS analysis of the TMS derivatives of the hydrolysate of **3**, **4**, and authentic D-xylose.

**Figure S4.**  $^1\text{H}$  NMR data of **3**.

**Figure S5.**  $^{13}\text{C}$  NMR data of **3**.

**Figure S6.** DEPT90 data of **3**.

**Figure S7.** DEPT135 data of **3**.

**Figure S8.** HSQC data of **3**.

**Figure S9.** COSY data of **3**.

**Figure S10.** TOCSY data of **3**.

**Figure S11.** HMBC data of **3**.

**Figure S12.**  $^1\text{H}$  NMR data of **4**.

**Figure S13.**  $^{13}\text{C}$  NMR data of **4**.

**Figure S14.** DEPT90 data of **4**.

**Figure S15.** DEPT135 data of **4**.

**Figure S16.** HSQC data of **4**.

**Figure S17.** COSY data of **4**.

**Figure S18.** TOCSY data of **4**.

**Figure S19.** HMBC data of **4**.

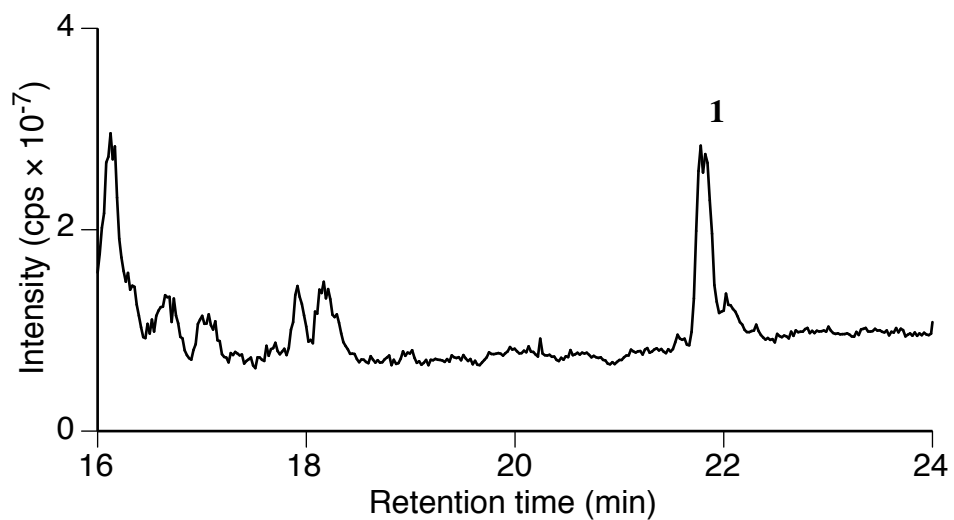

(a)

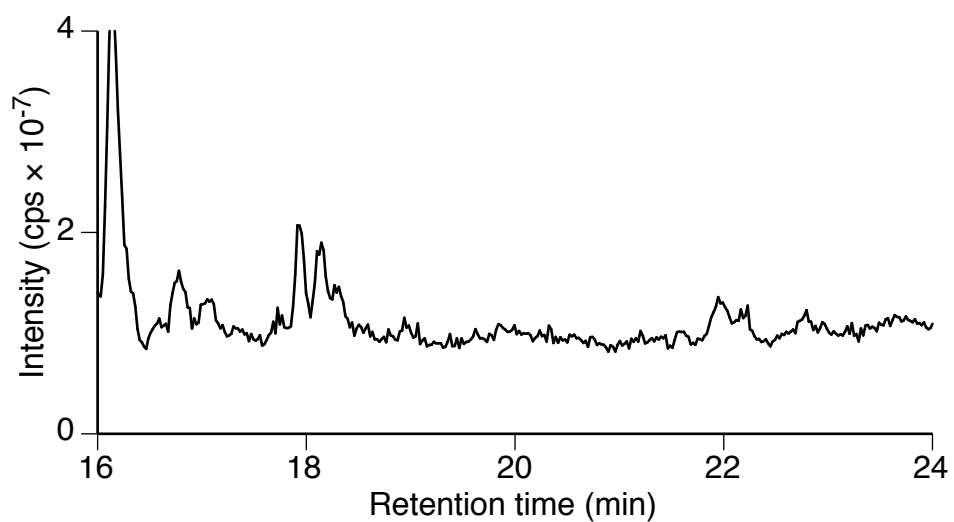

(b)

**Figure S1.**

Total ion current chromatograms obtained from the *Rhizoctonia solani* suspension culture without sakuranetin (**1**) and of the medium containing **1** without the fungus using LC-MS. (a) The 12-h-incubated sample without *R. solani* containing **1**; (b) the 12-h-incubated sample with *R. solani* without **1**.

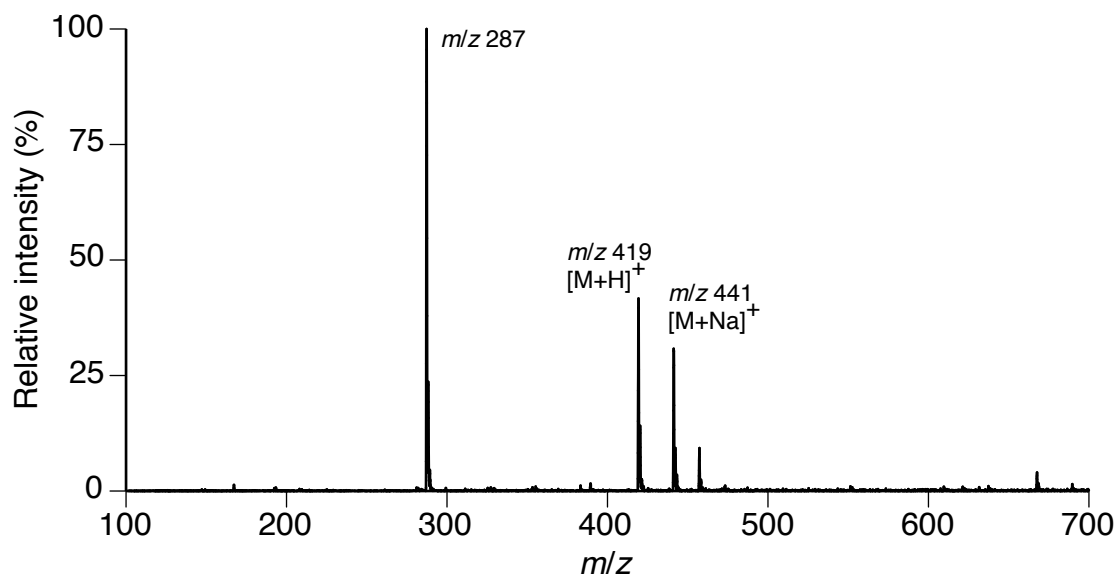

(a)

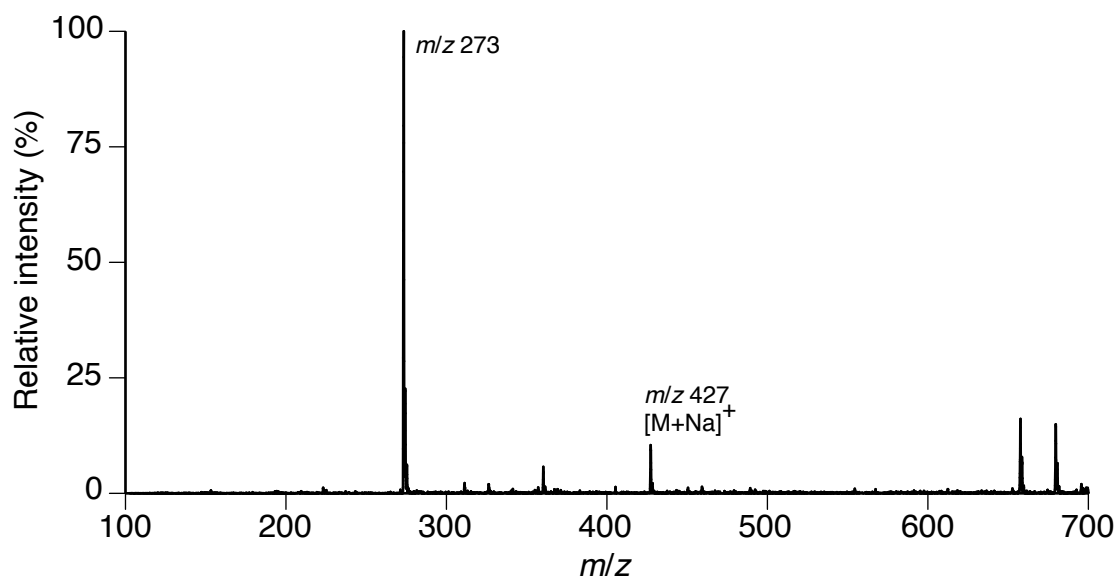

(b)

**Figure S2.** ESI-MS of peak I ( $t_R$  17.4 min) and peak III ( $t_R$  20.5 min) from the LC-MS analysis of the *Rhizoctonia solani* suspension culture containing sakuranetin (**1**). (a) peak I; (b) peak III.

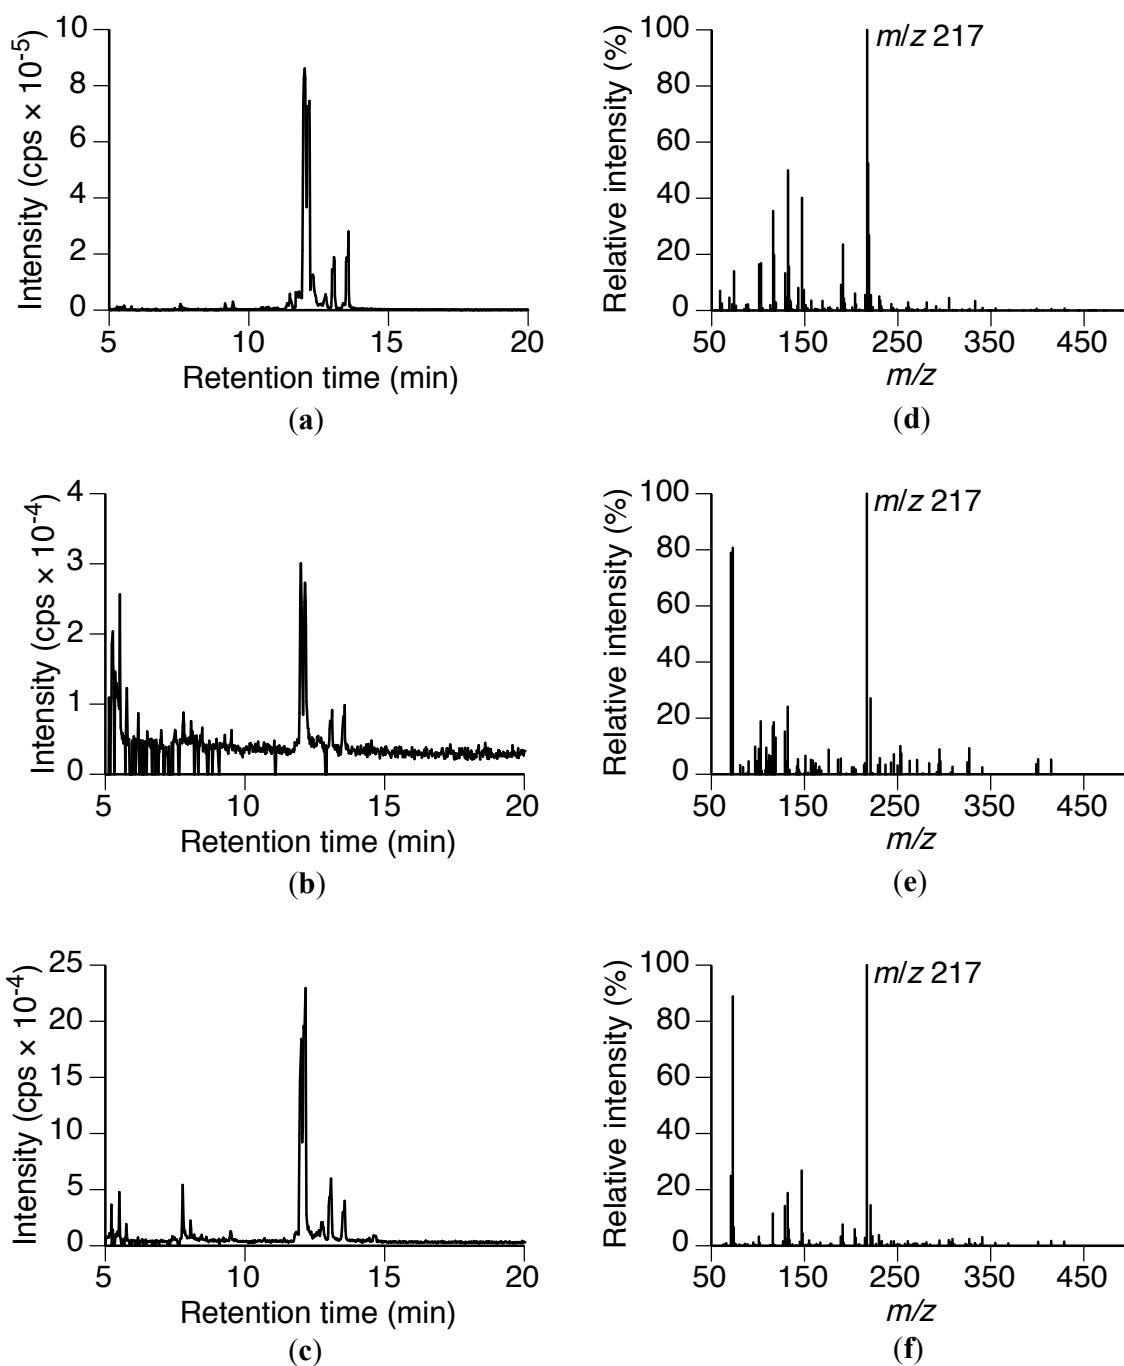

**Figure S3.** GC-MS analysis of the TMS derivatives of the hydrolysate of **3**, **4**, and authentic D-xylose. (a) Mass chromatogram at  $m/z$  217 signal (base peak of TMS-D-xylose) of the TMS derivatives of authentic D-xylose; (b) mass chromatogram at  $m/z$  217 signal of the TMS derivatives of the hydrolysate of **3**; (c) mass chromatogram at  $m/z$  217 signal of the TMS derivatives of the hydrolysate of **4**; (d) mass spectrum of the peak at  $t_R$  12.0 min of the TMS derivatives of authentic D-xylose; (e) mass spectrum of the peak at  $t_R$  12.0 min of the TMS derivatives of the hydrolysate of **3**; (f) mass spectrum of the peak at  $t_R$  12.0 min of the TMS derivatives of the hydrolysate of **4**.

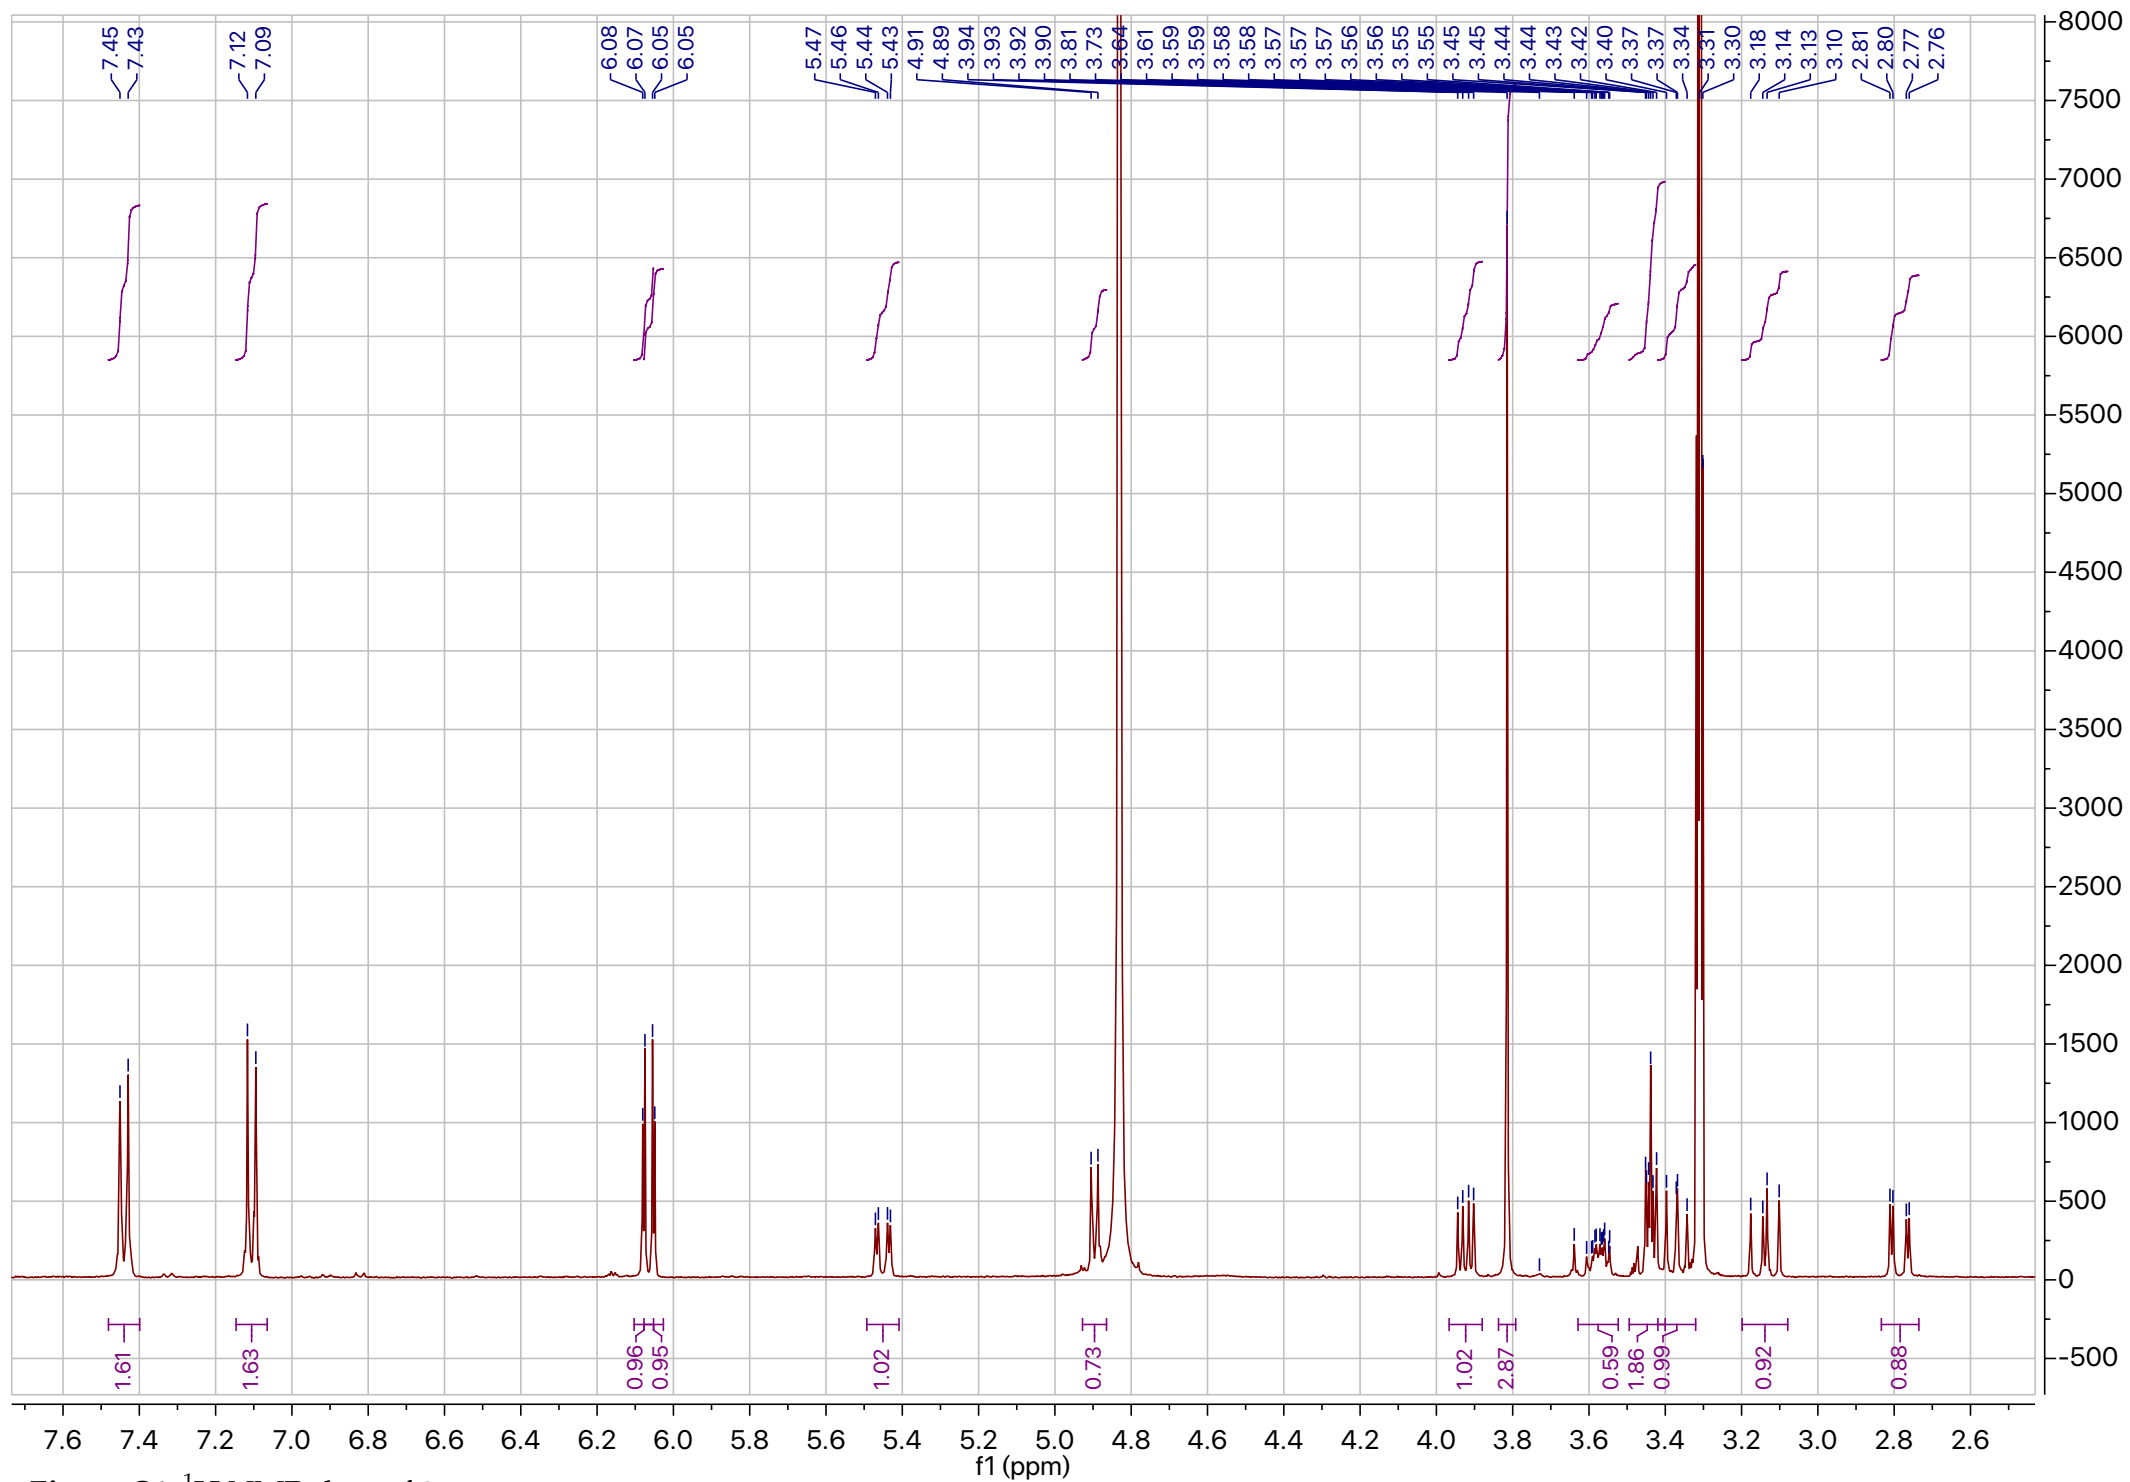

Figure S4. <sup>1</sup>H NMR data of 3.

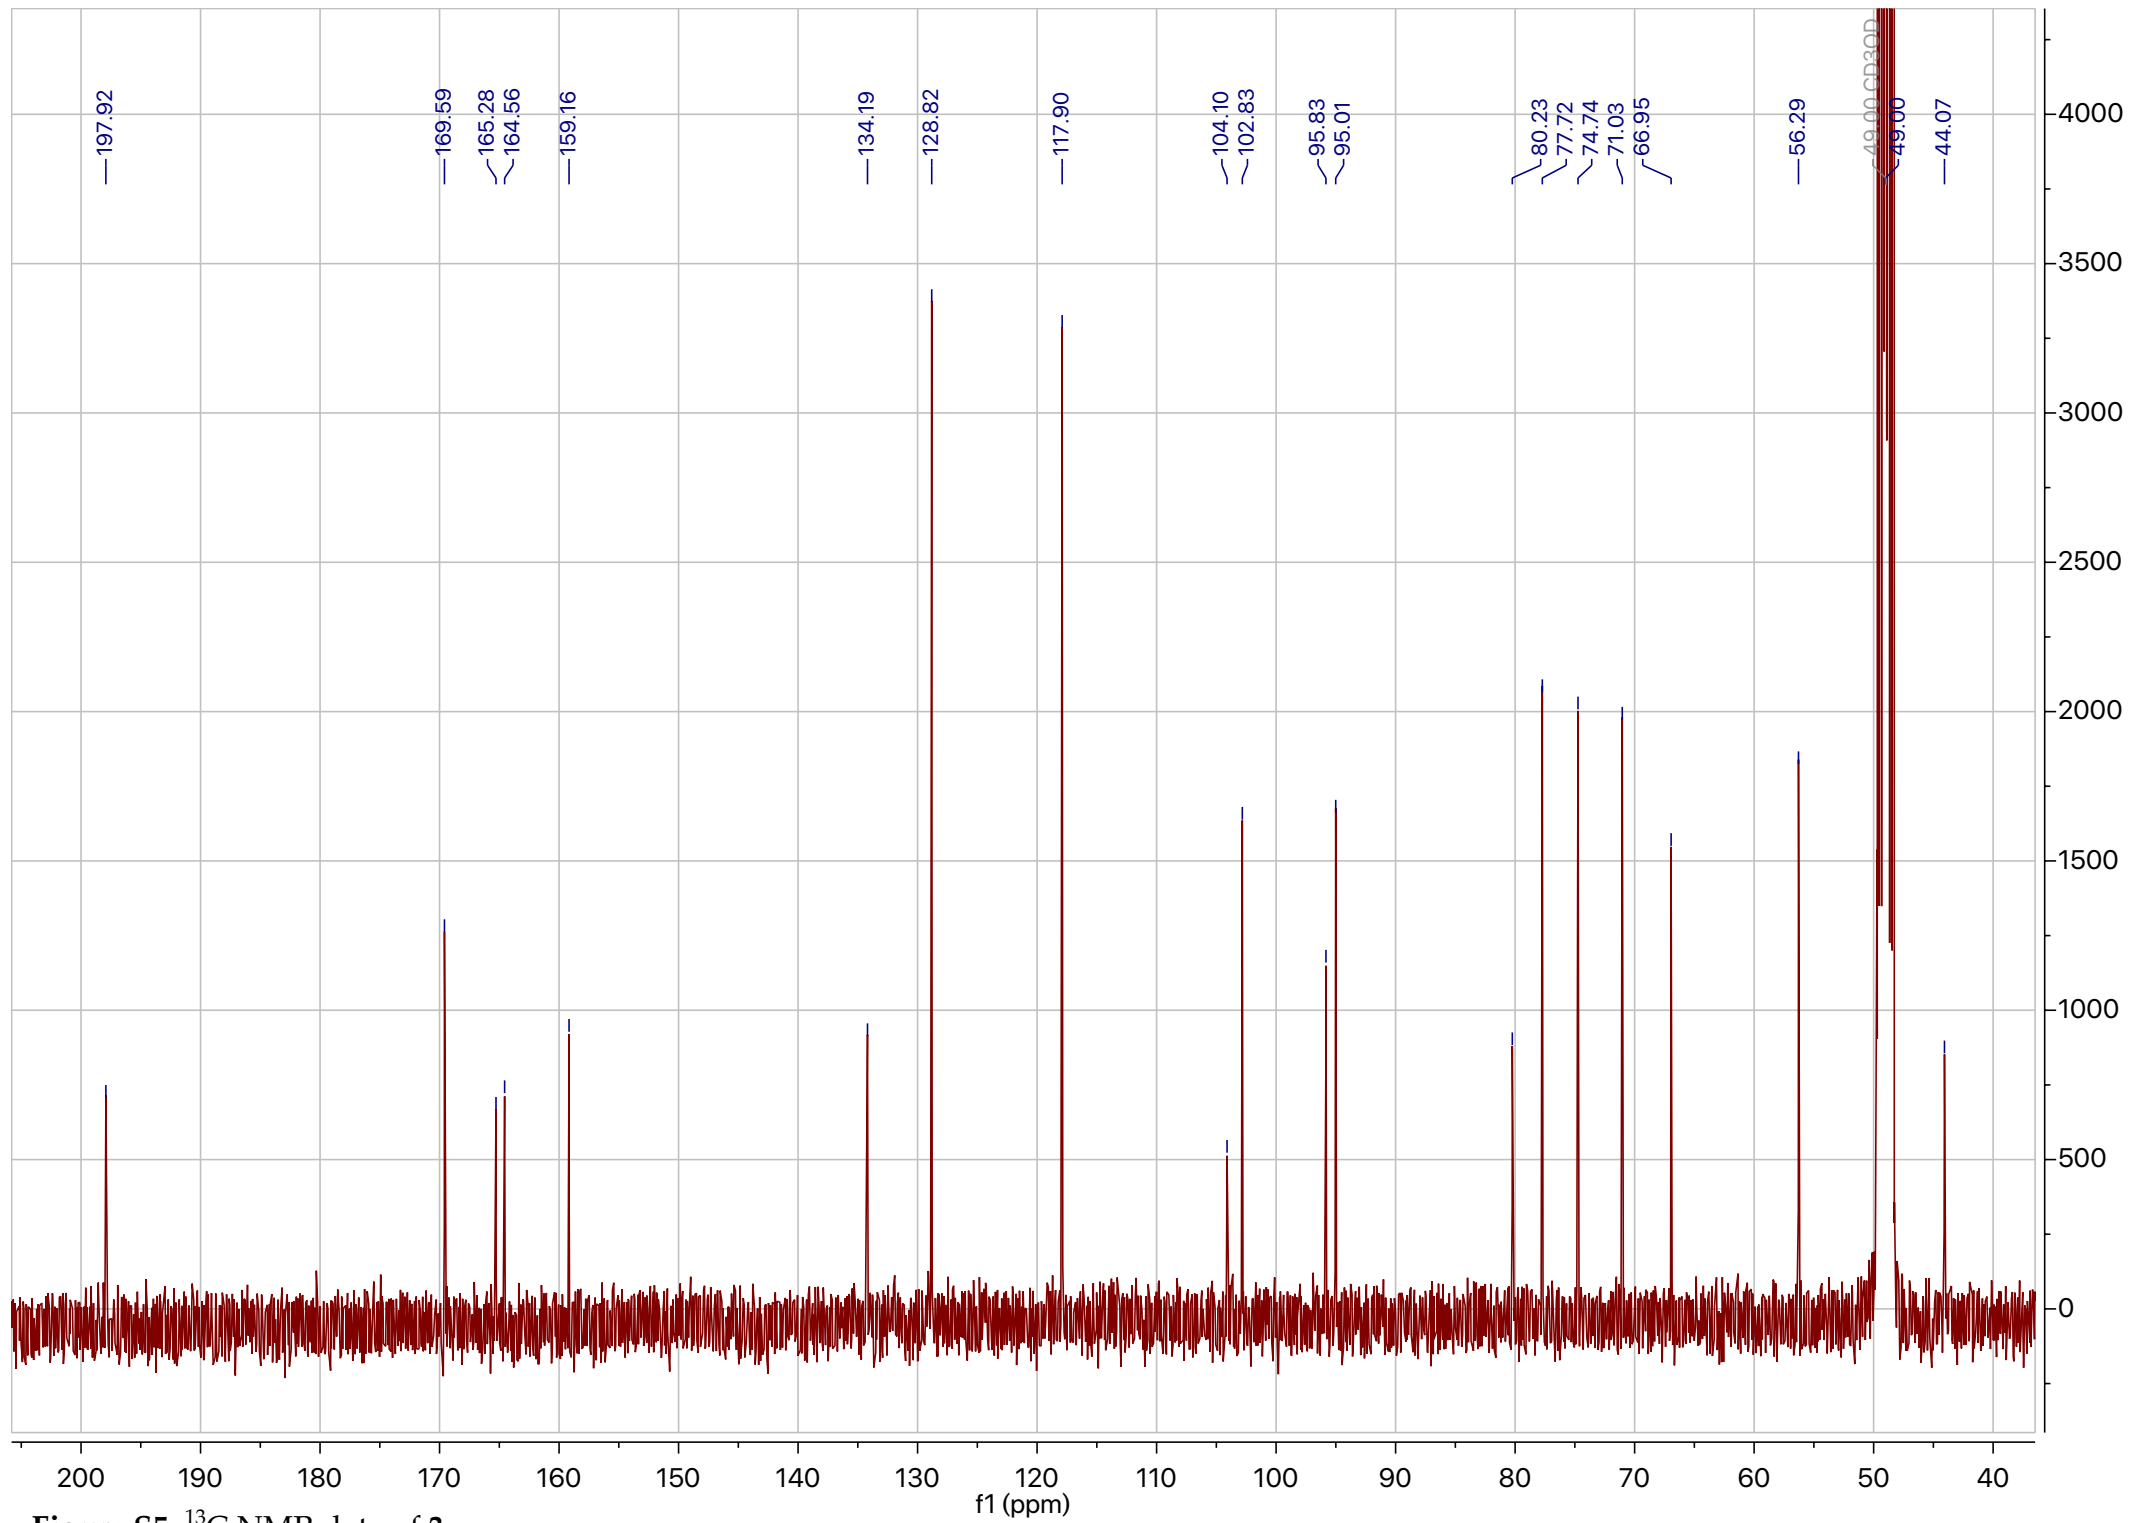

Figure S5.  $^{13}\text{C}$  NMR data of 3.

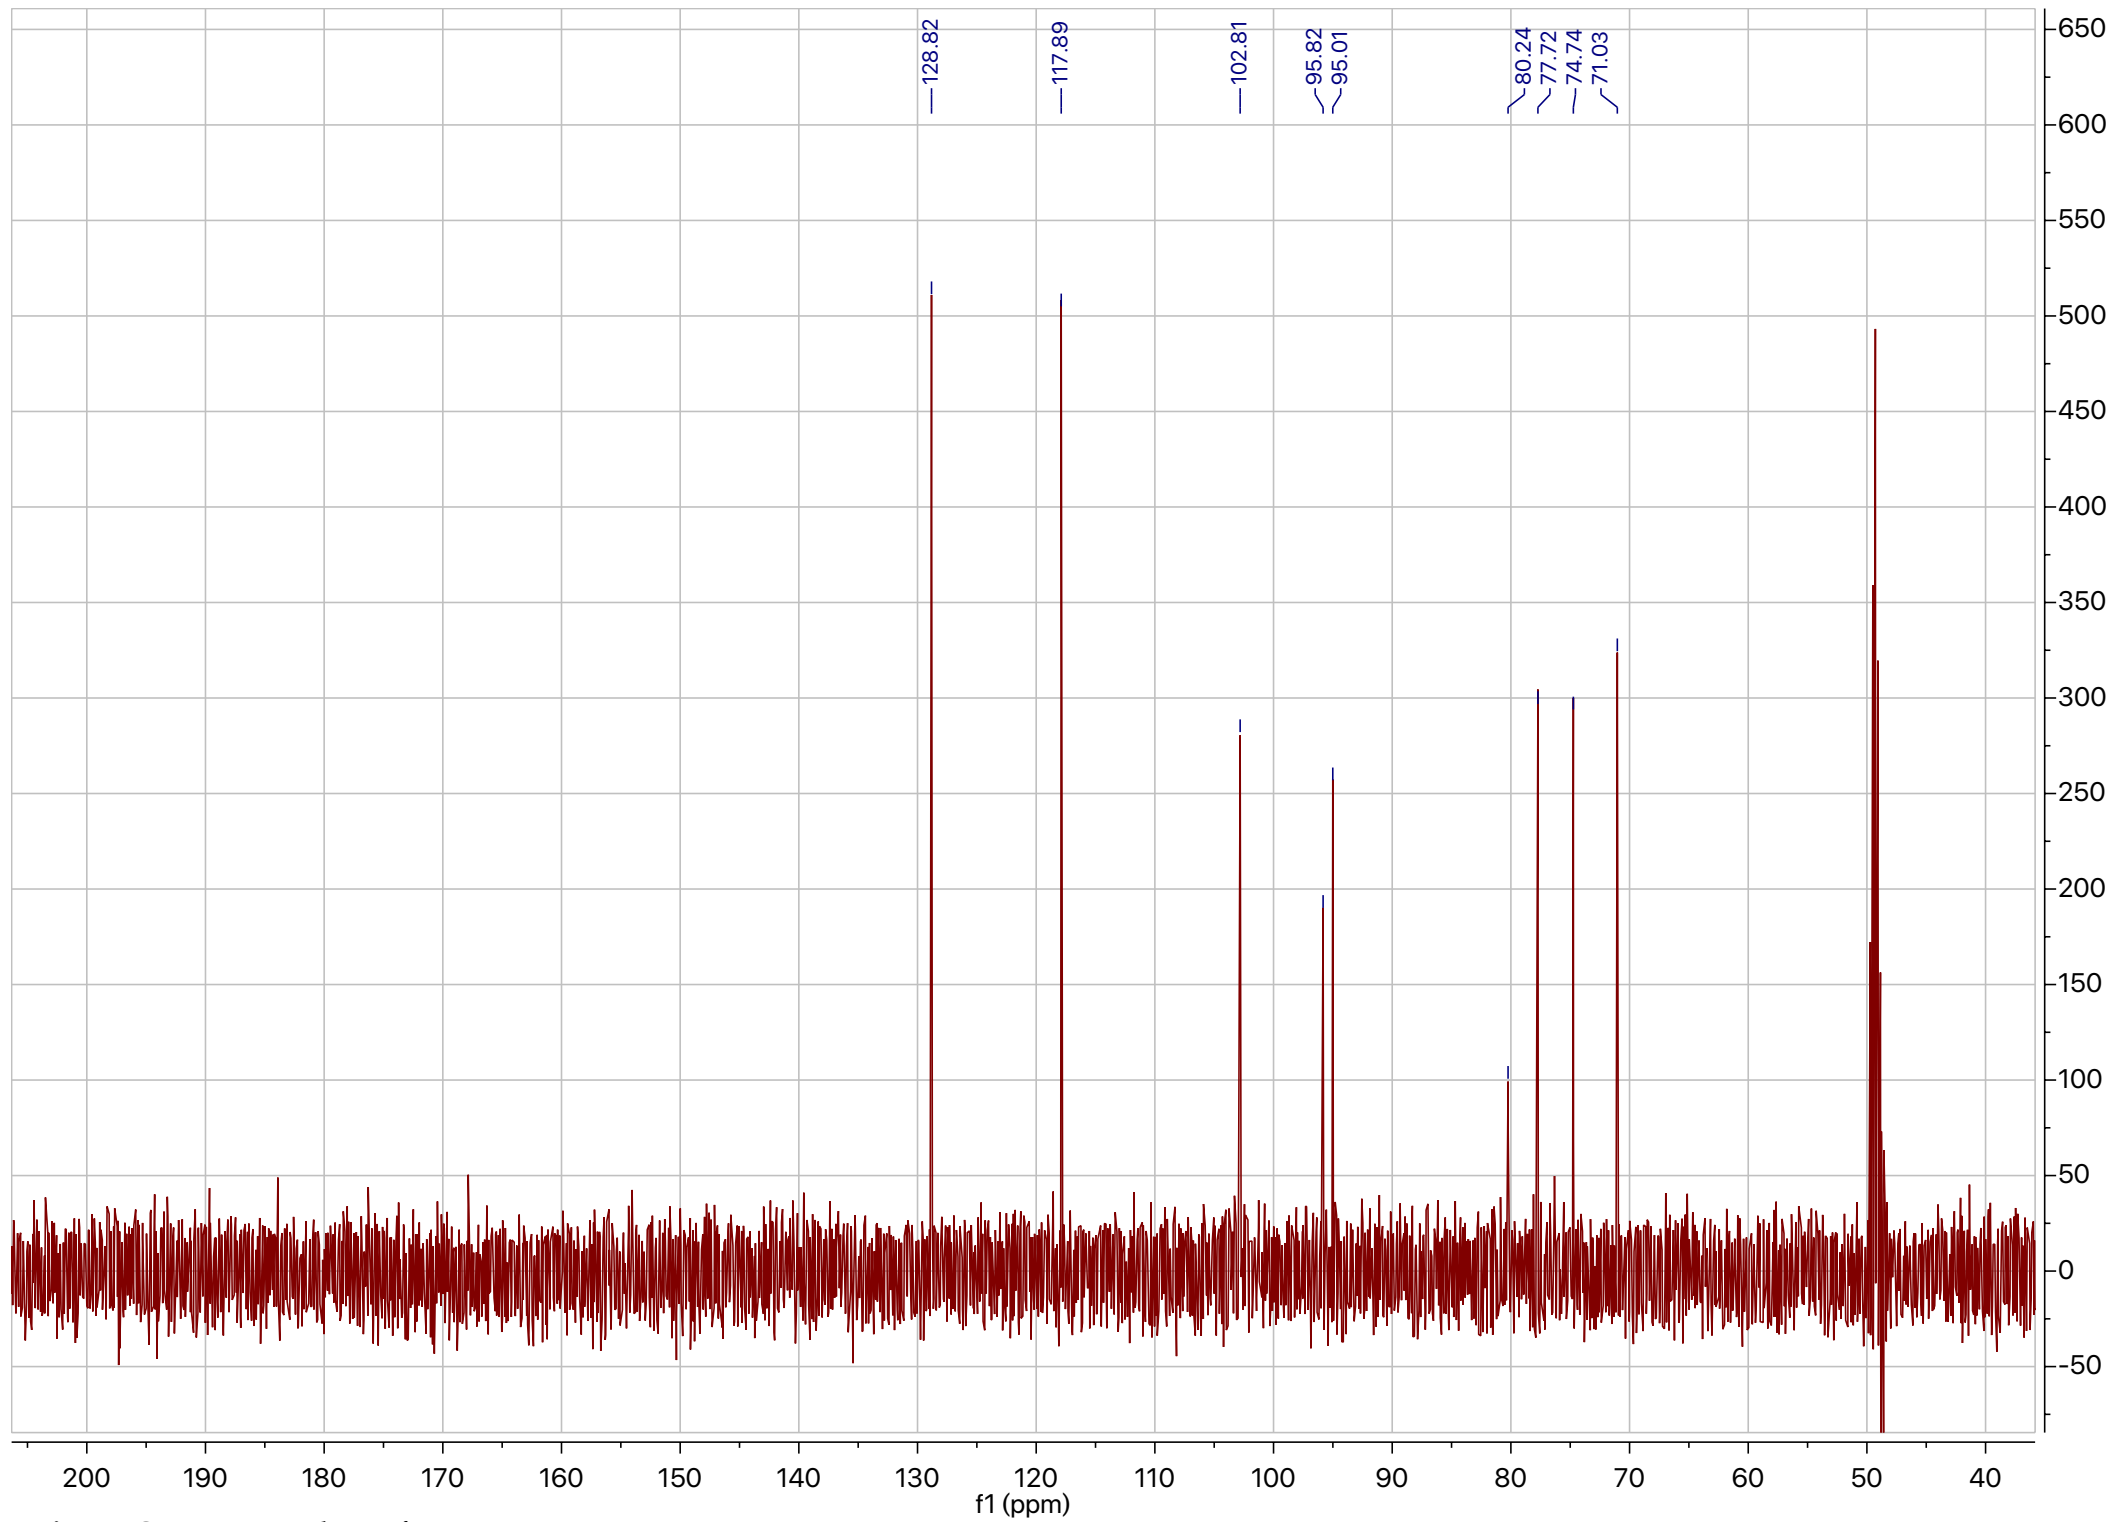

**Figure S6.** DEPT90 data of 3.

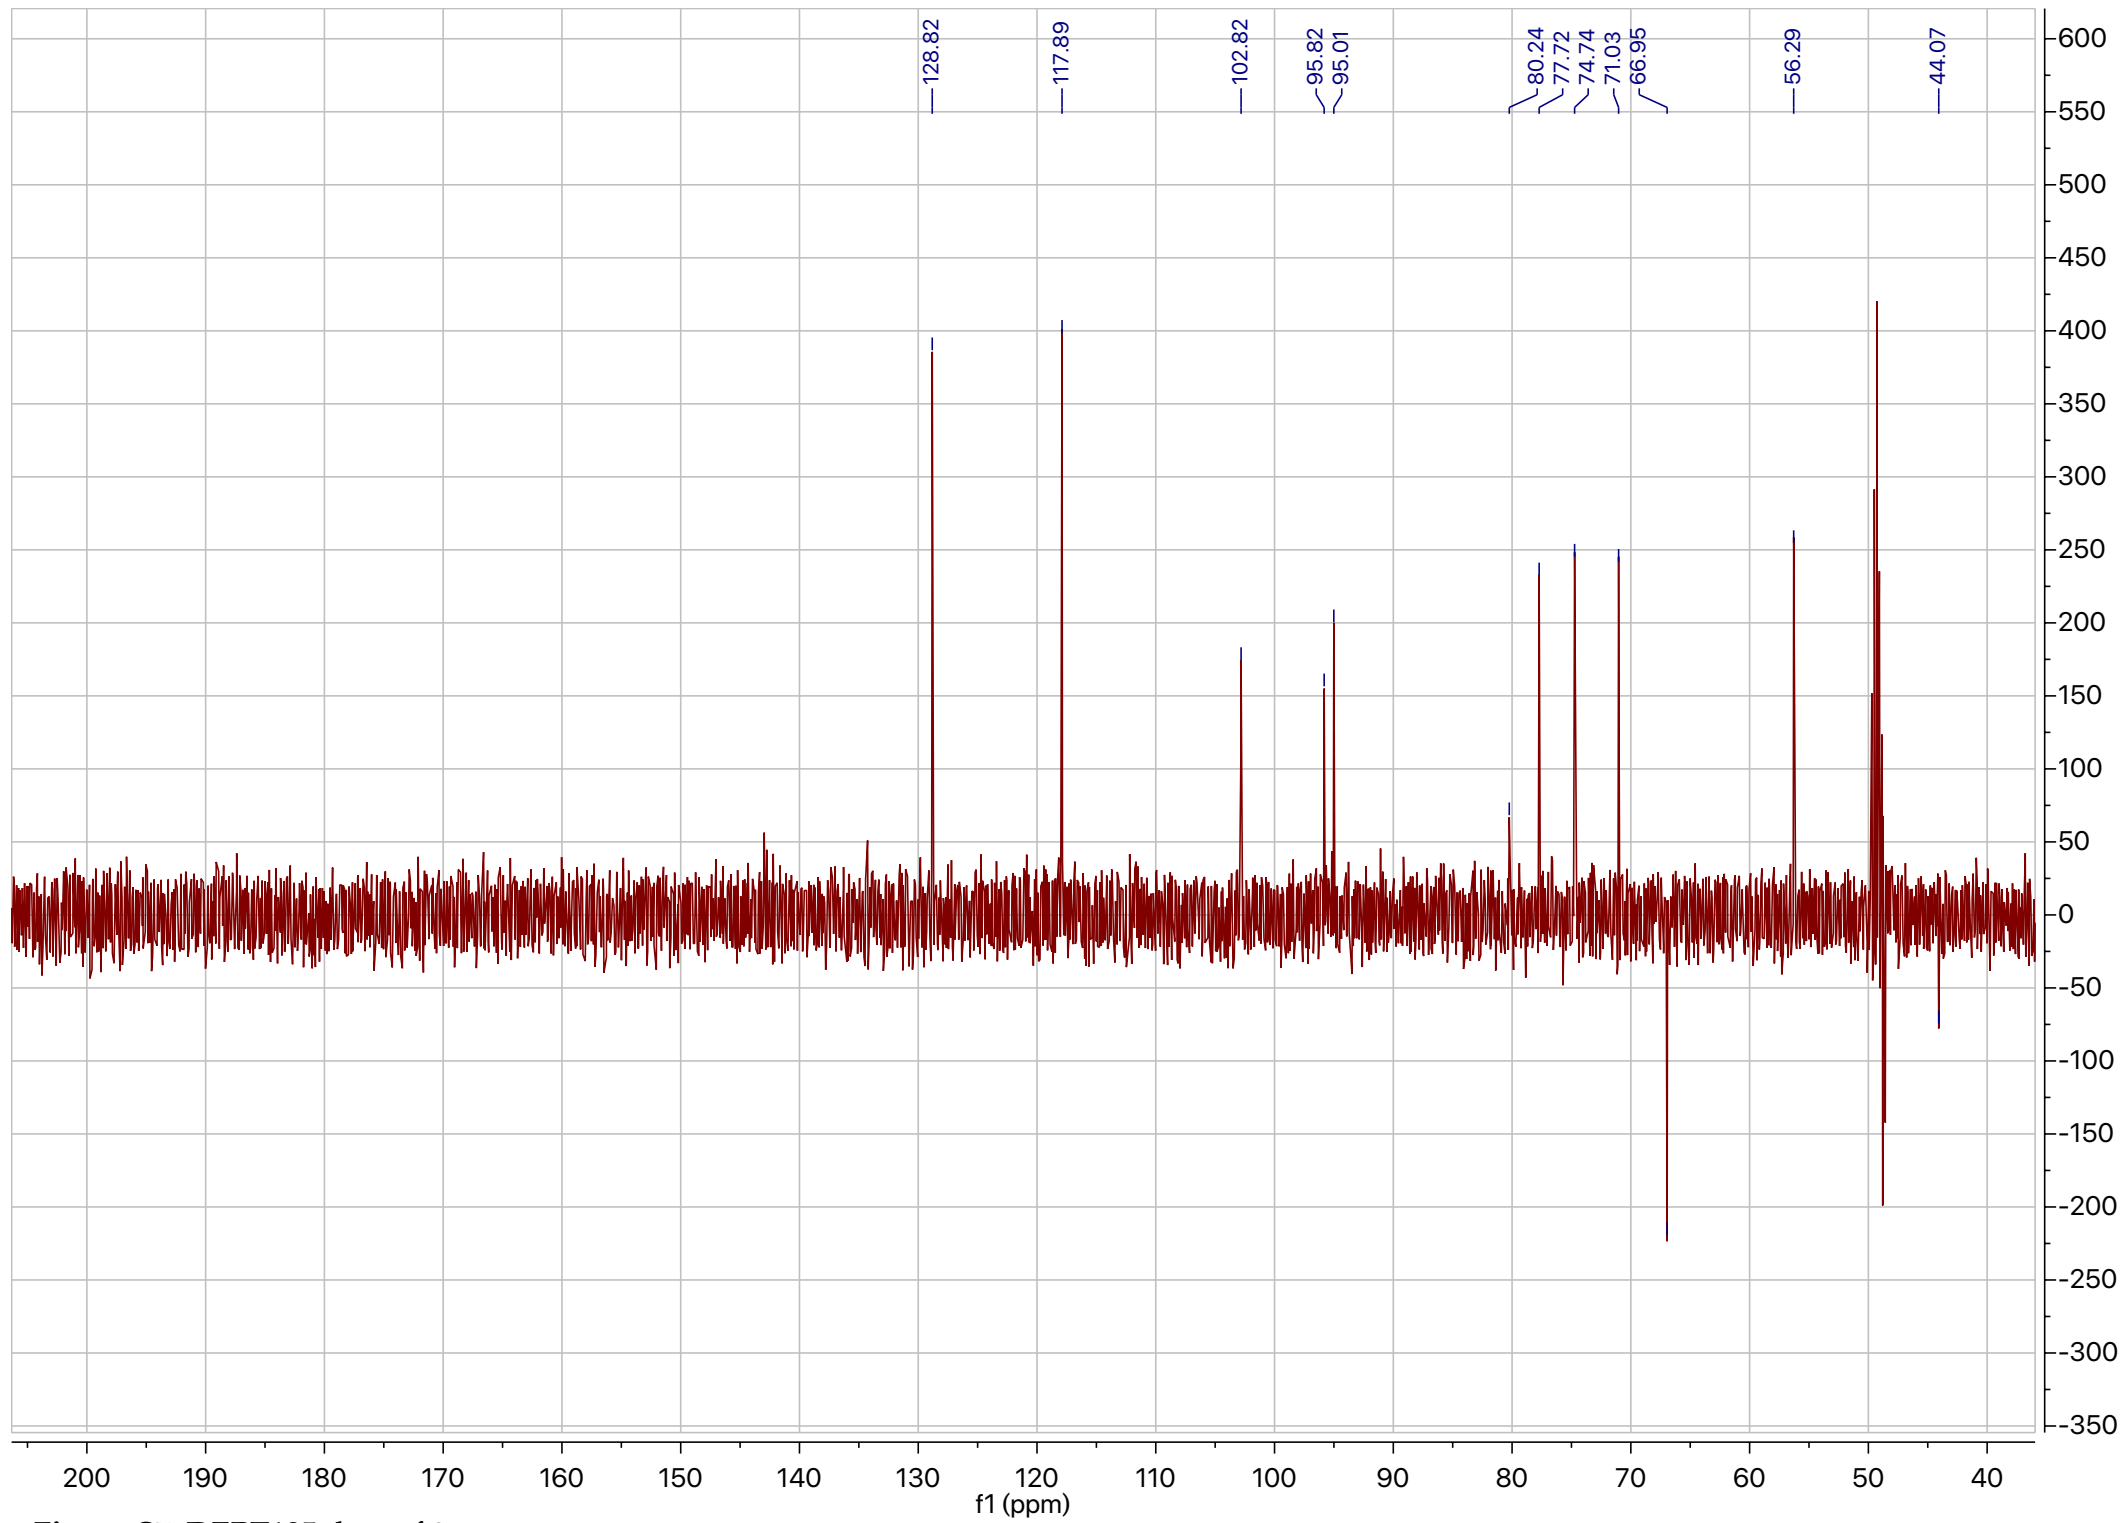

Figure S7. DEPT135 data of 3.



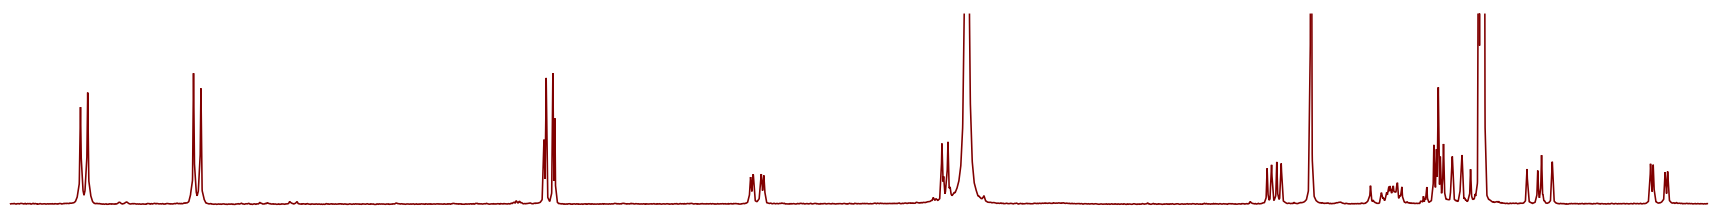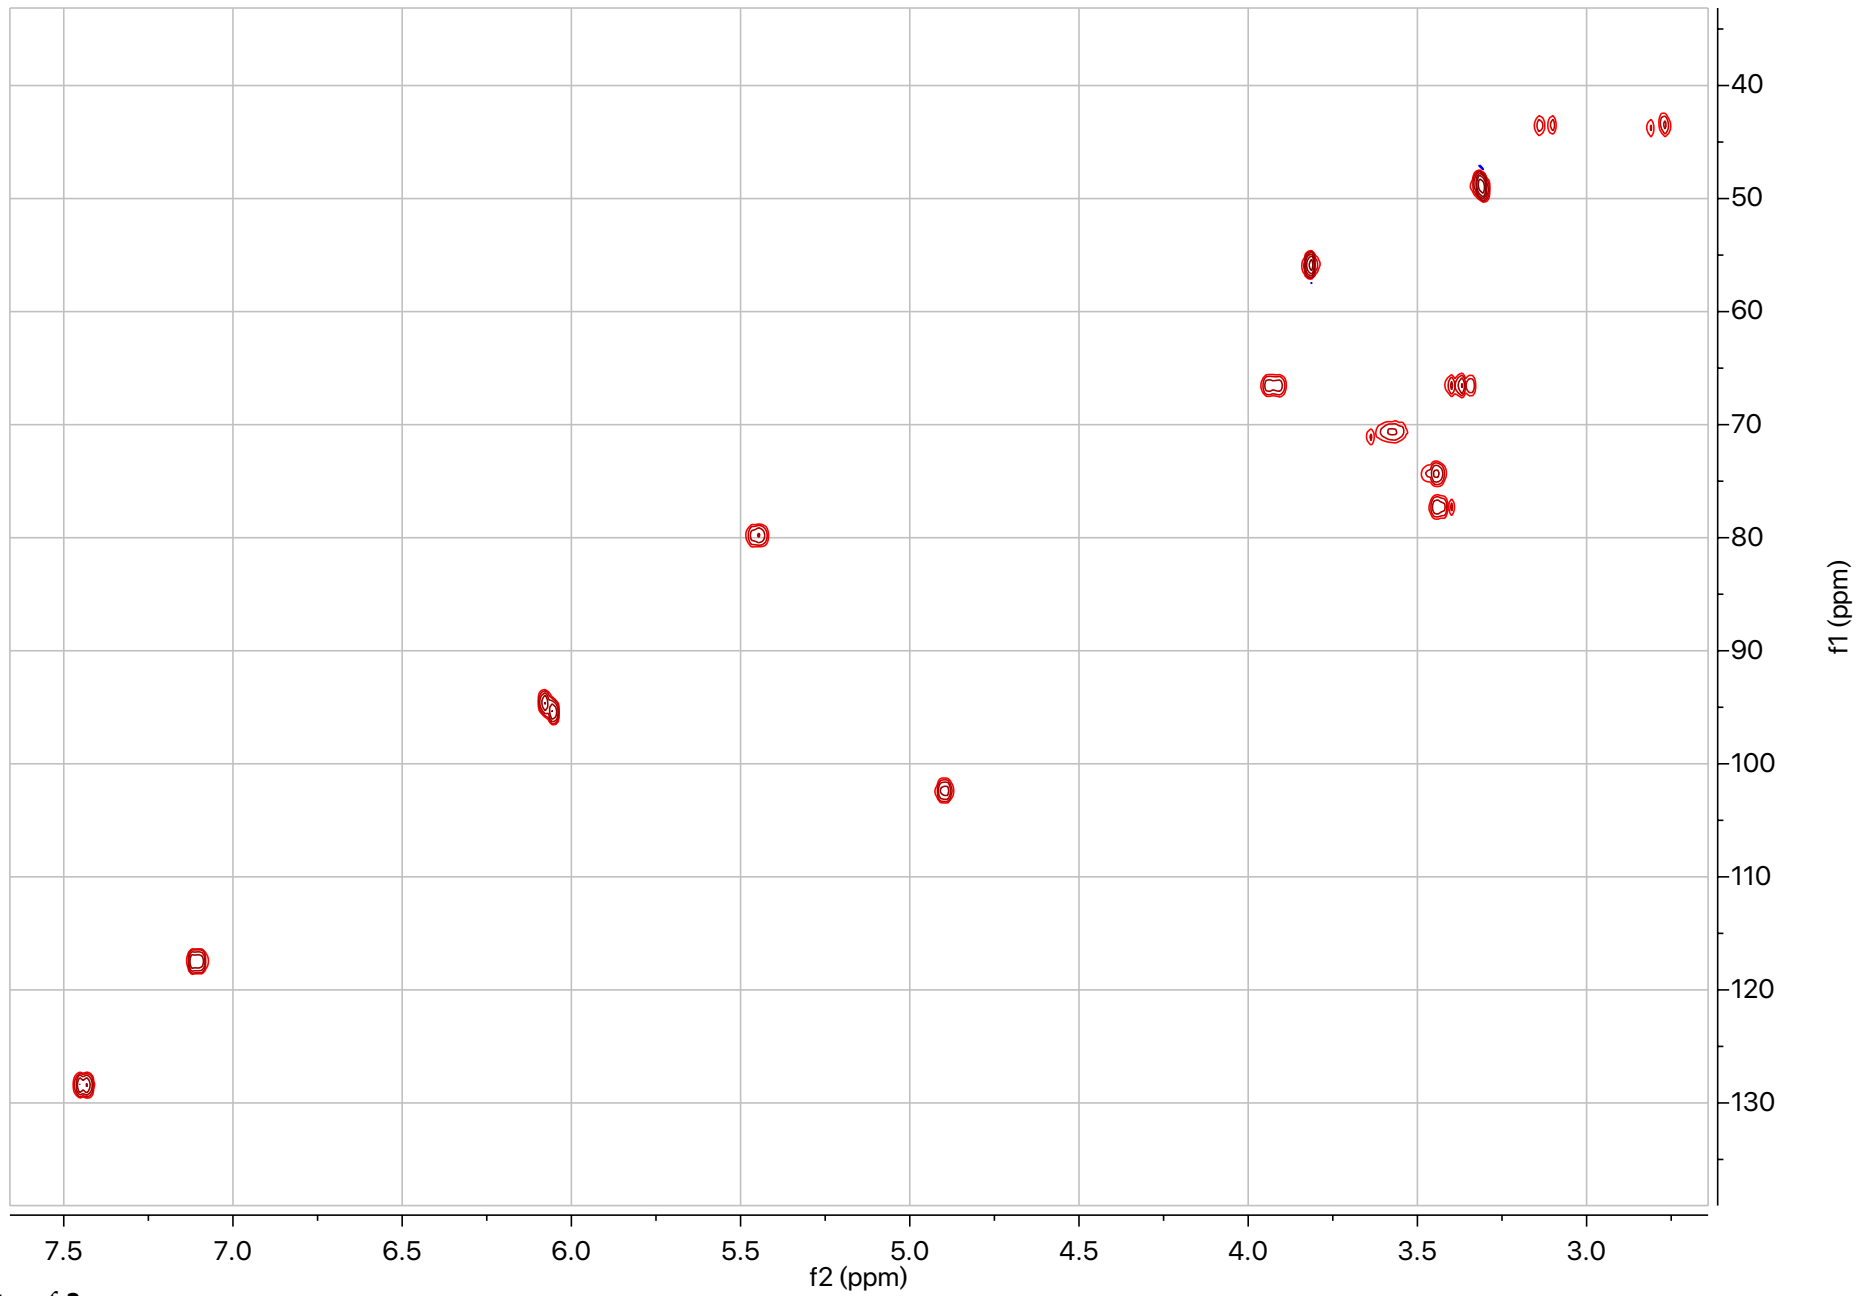

Figure S8. HSQC data of 3.

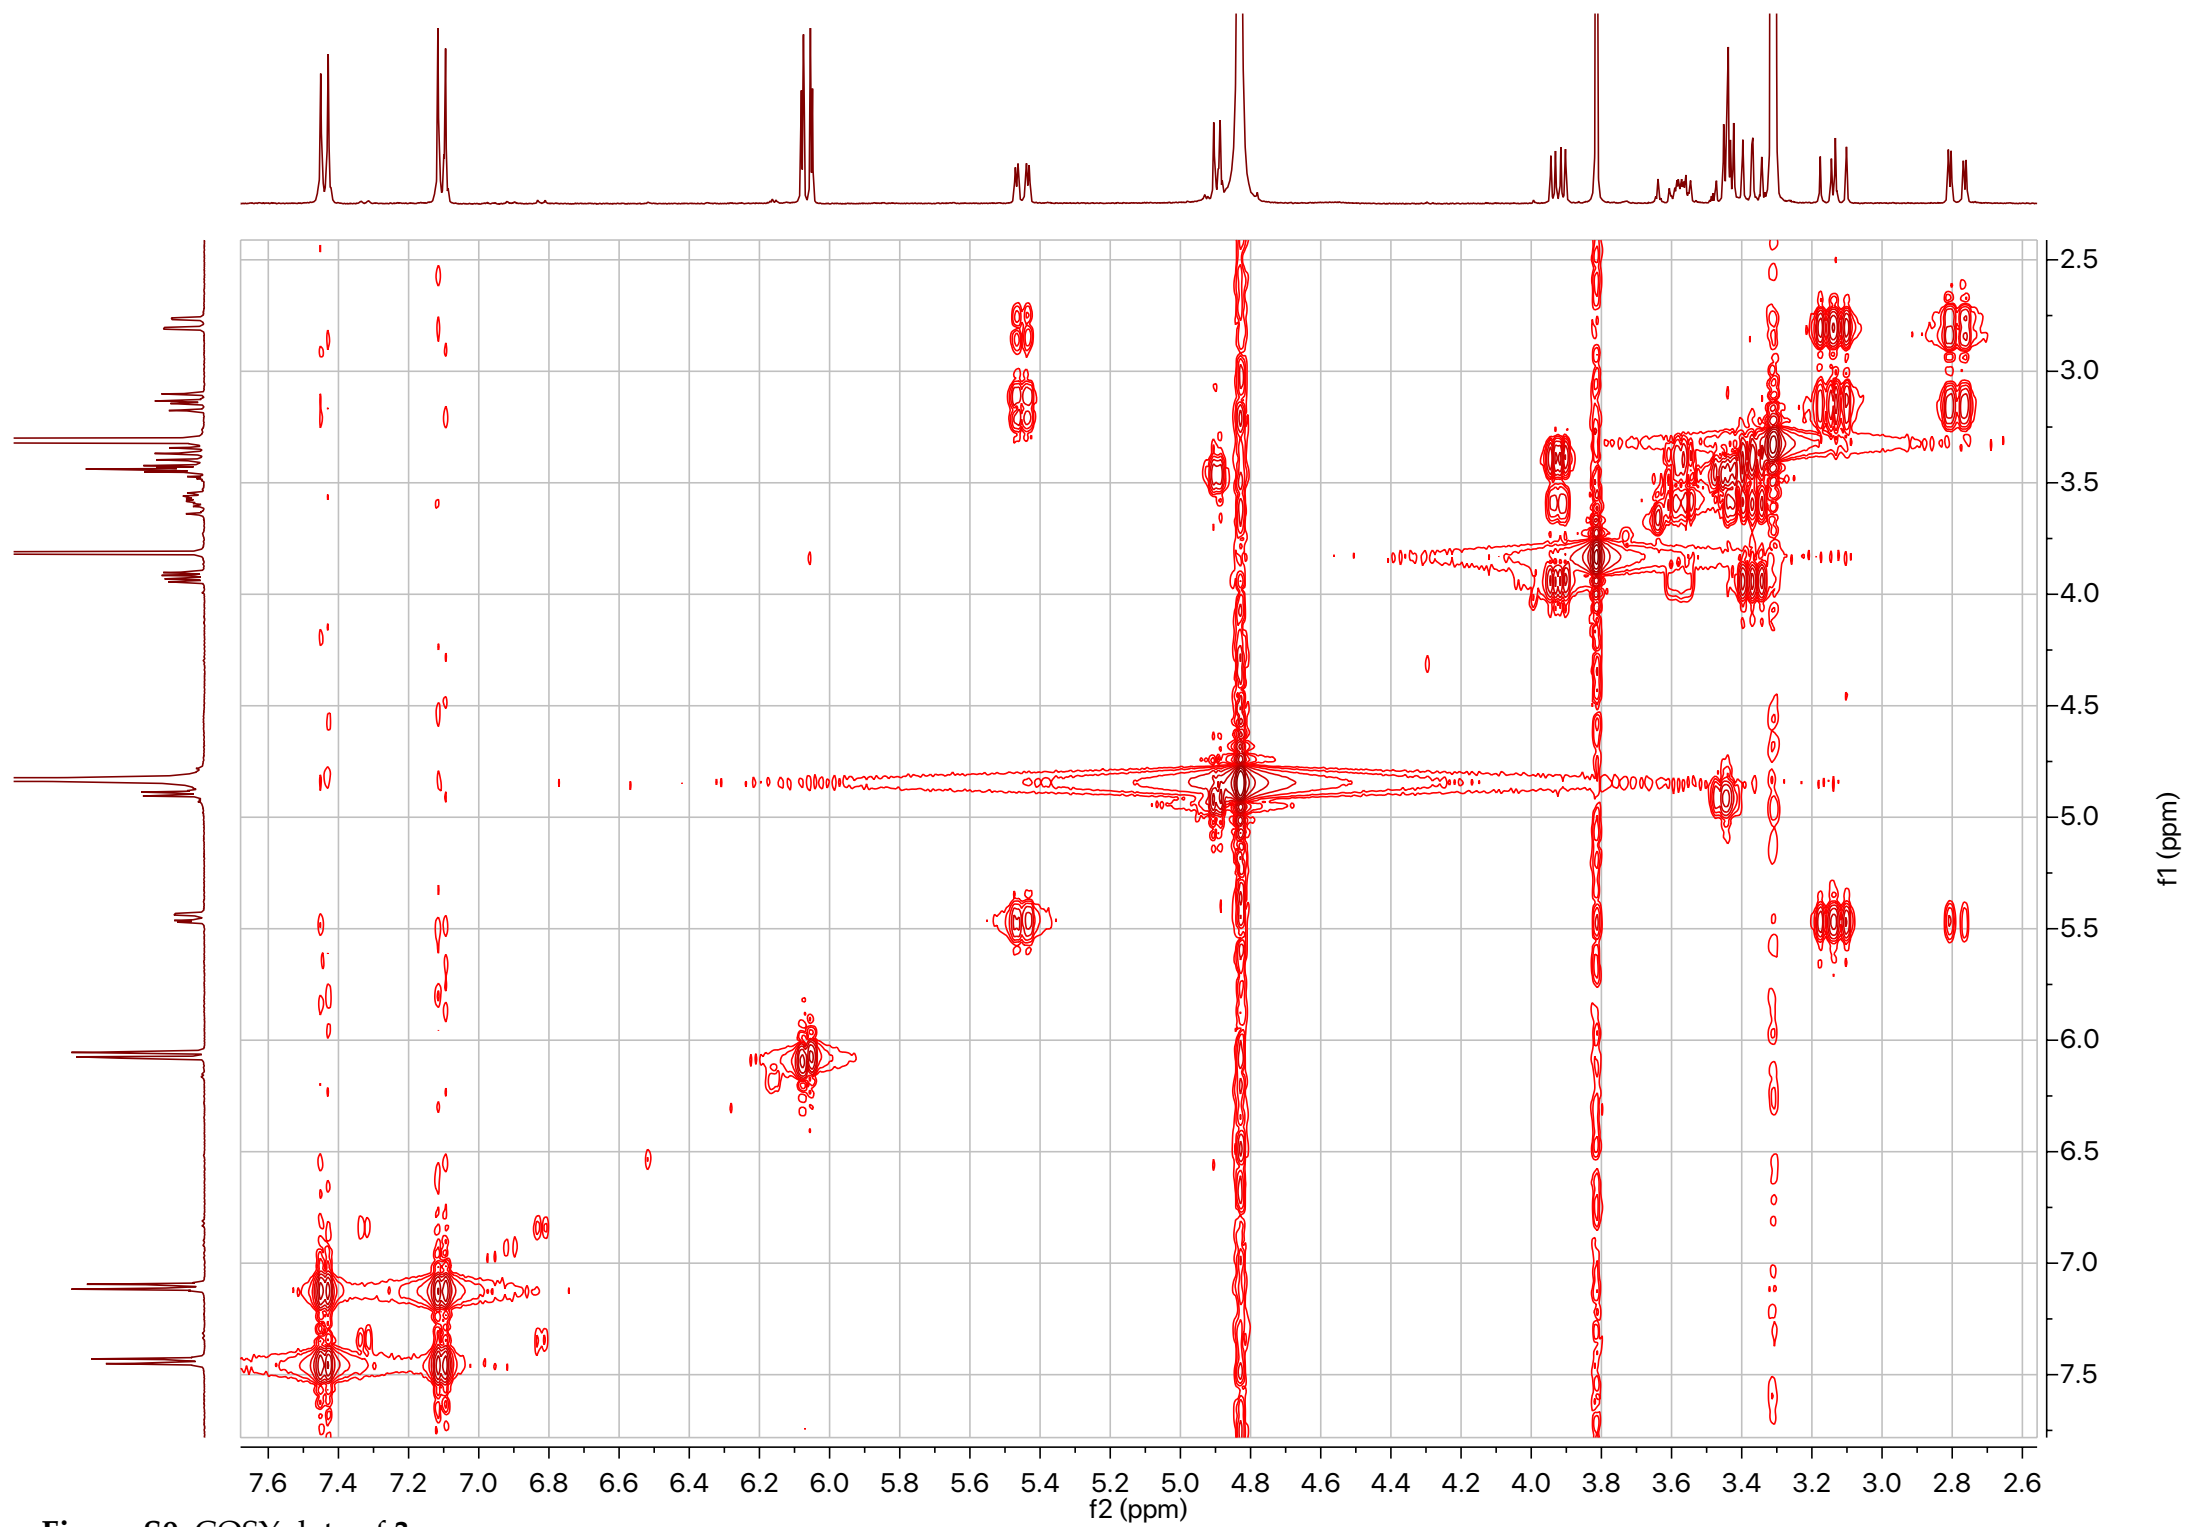

Figure S9. COSY data of 3.

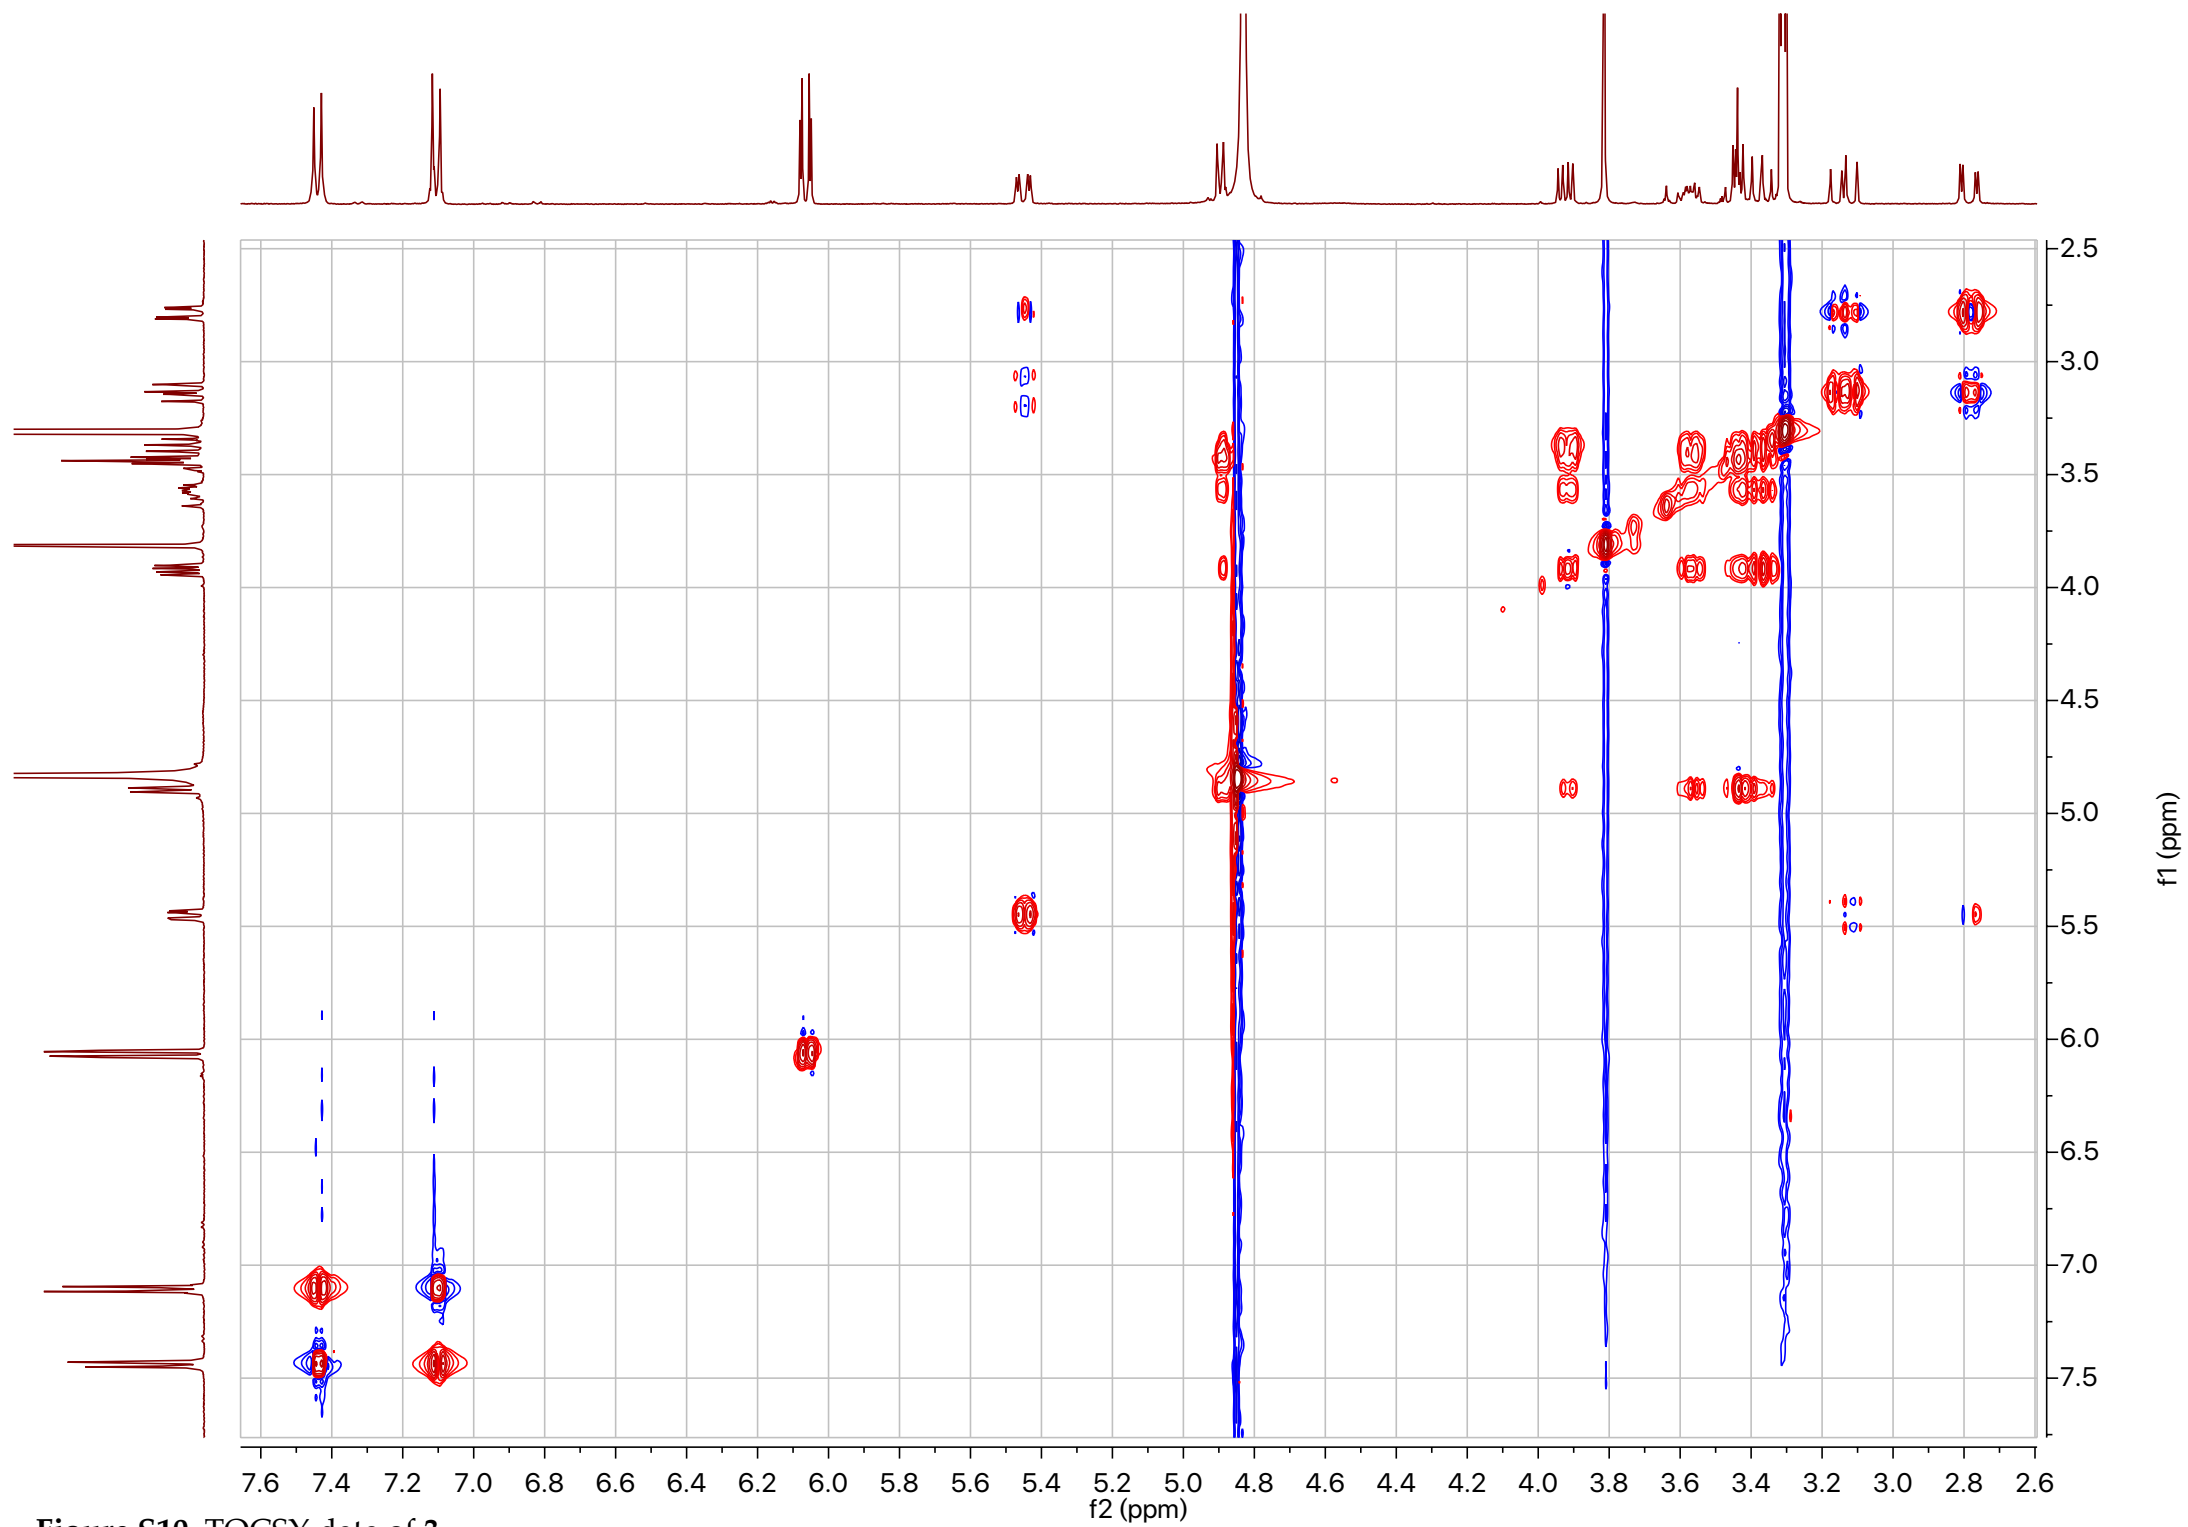

Figure S10. TOCSY data of 3.

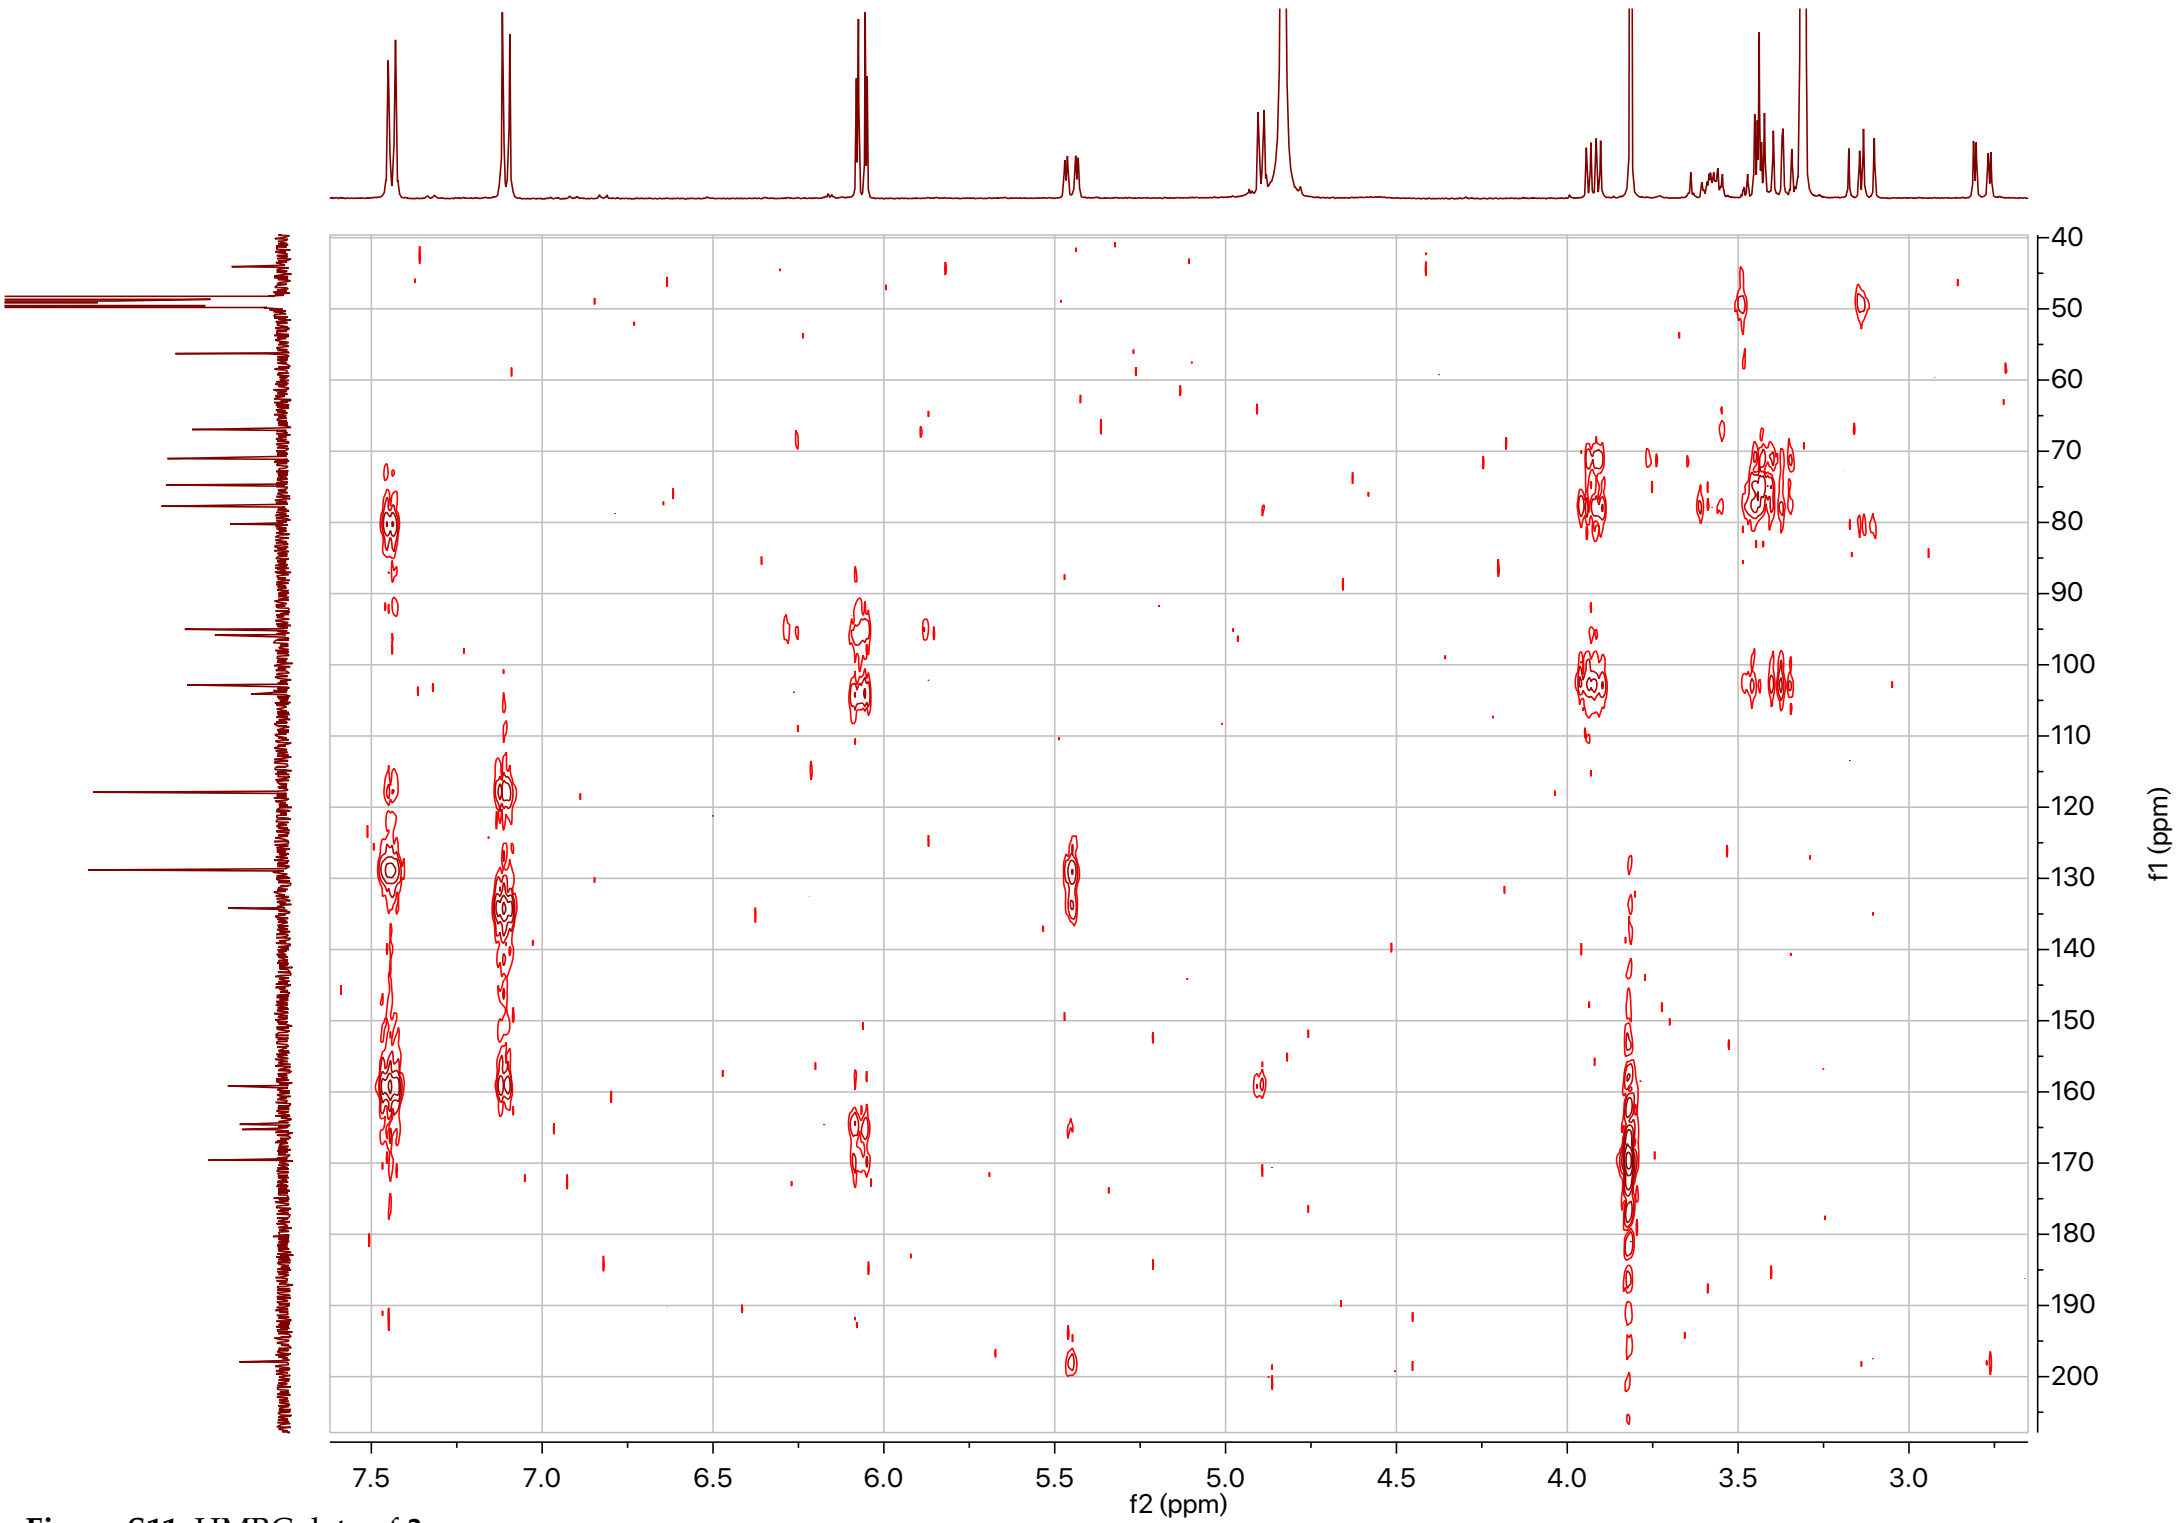

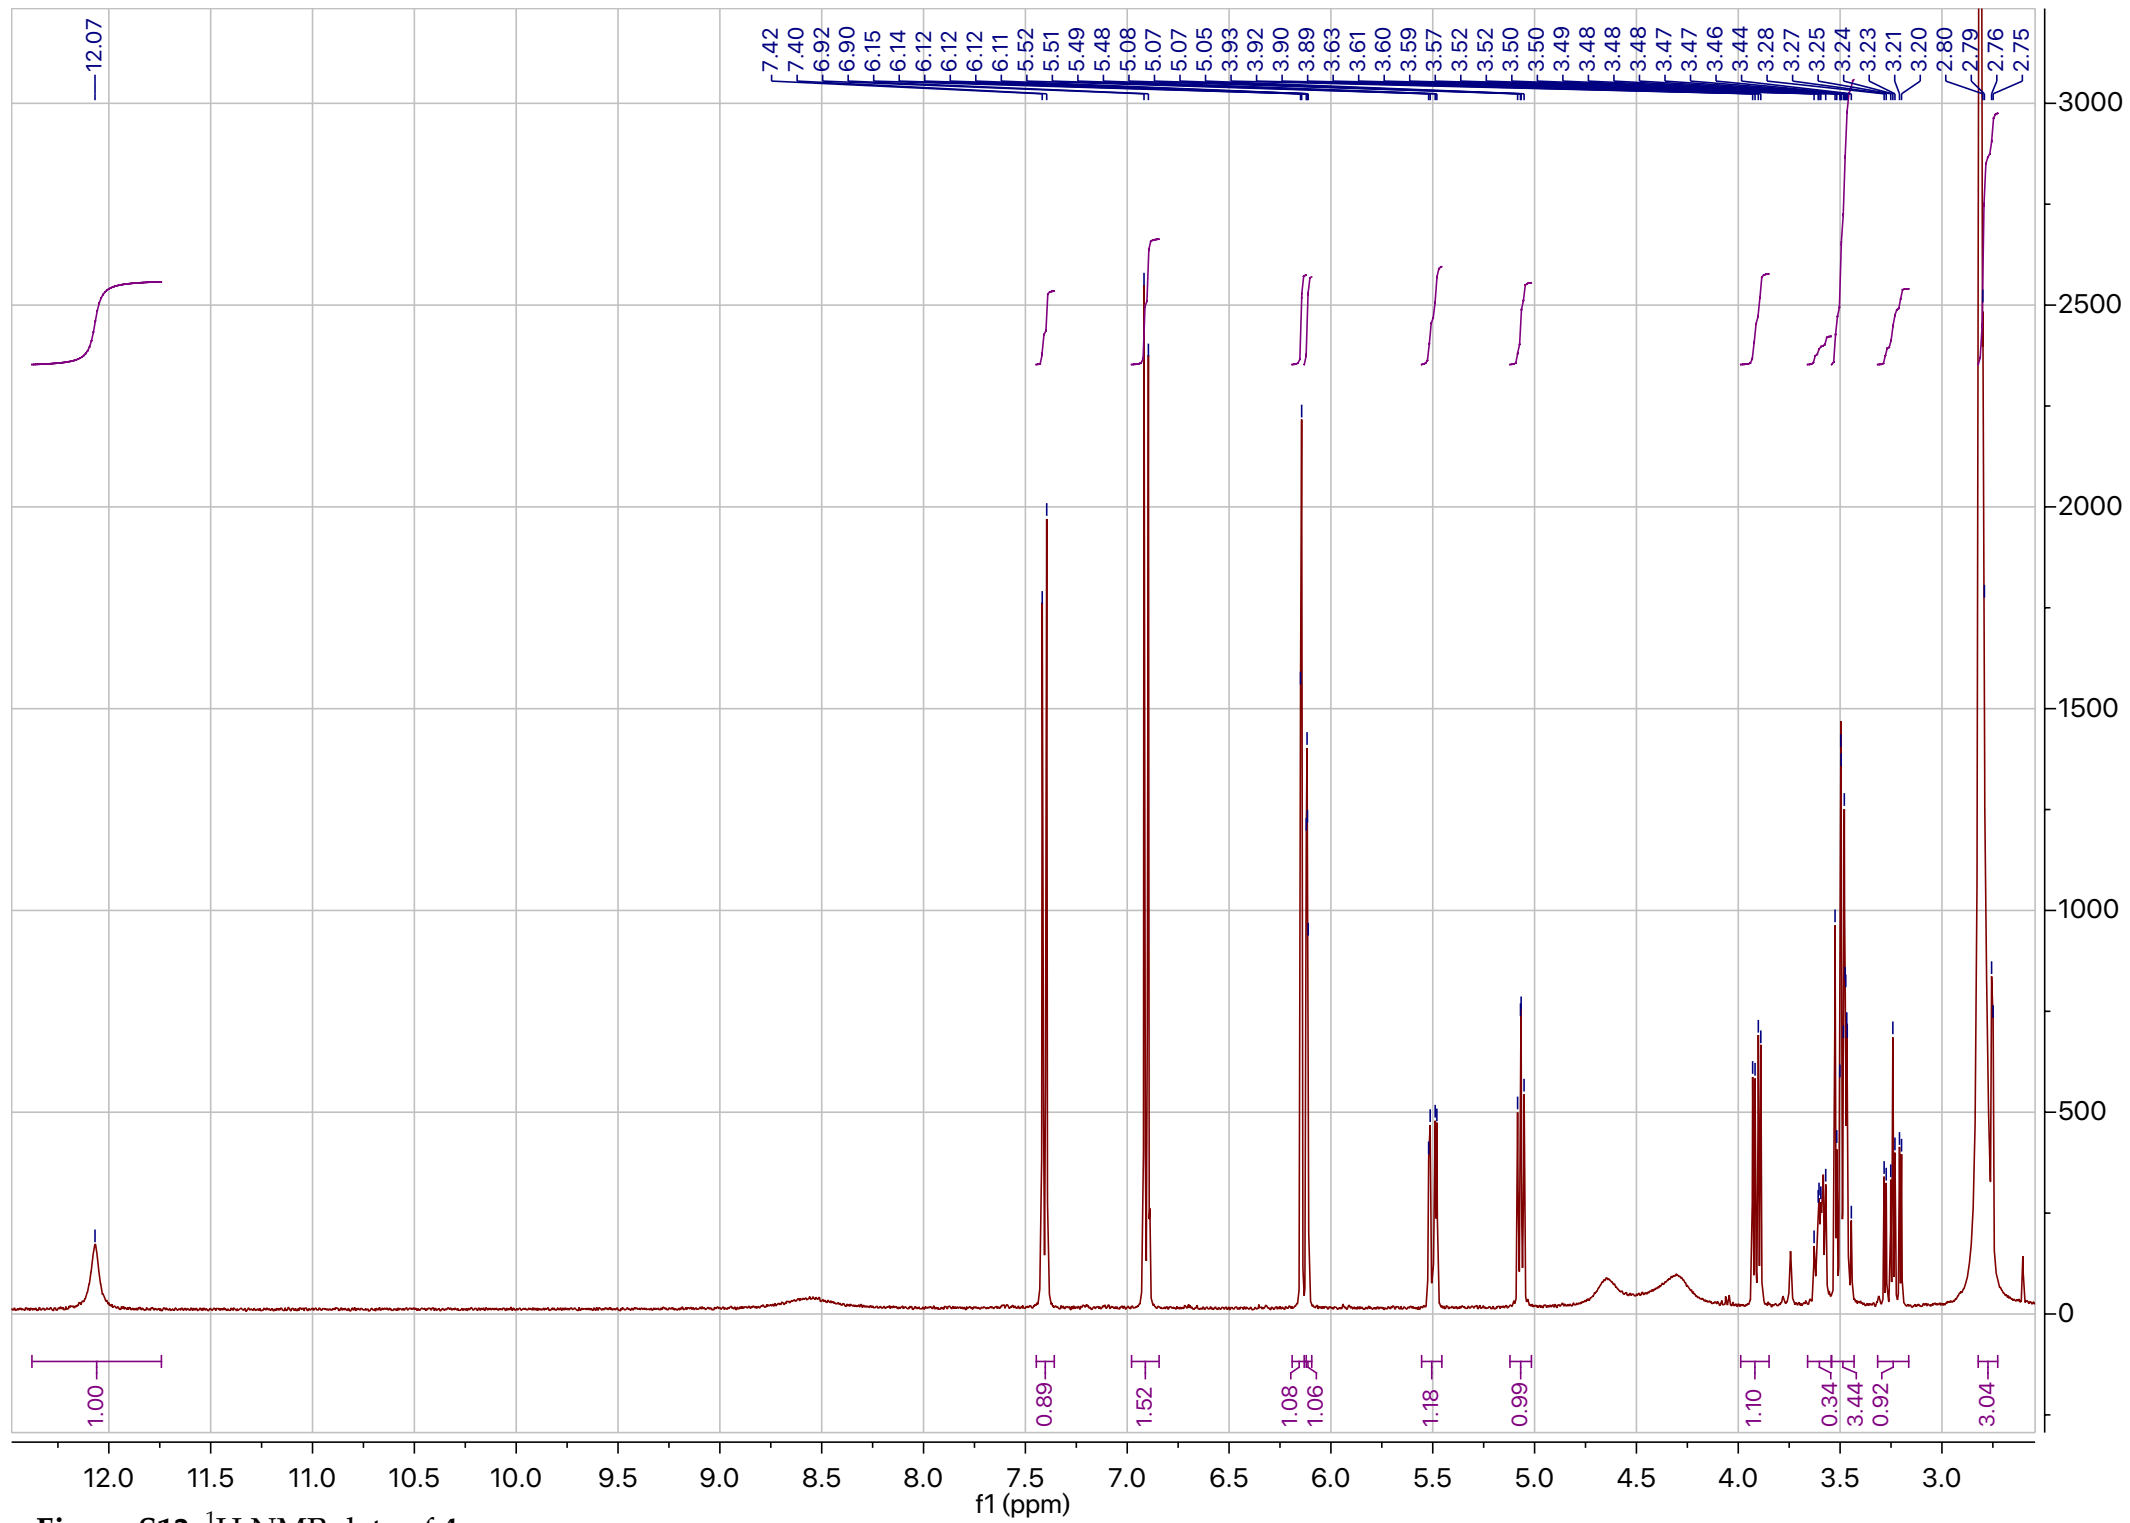

Figure S12. <sup>1</sup>H NMR data of 4.

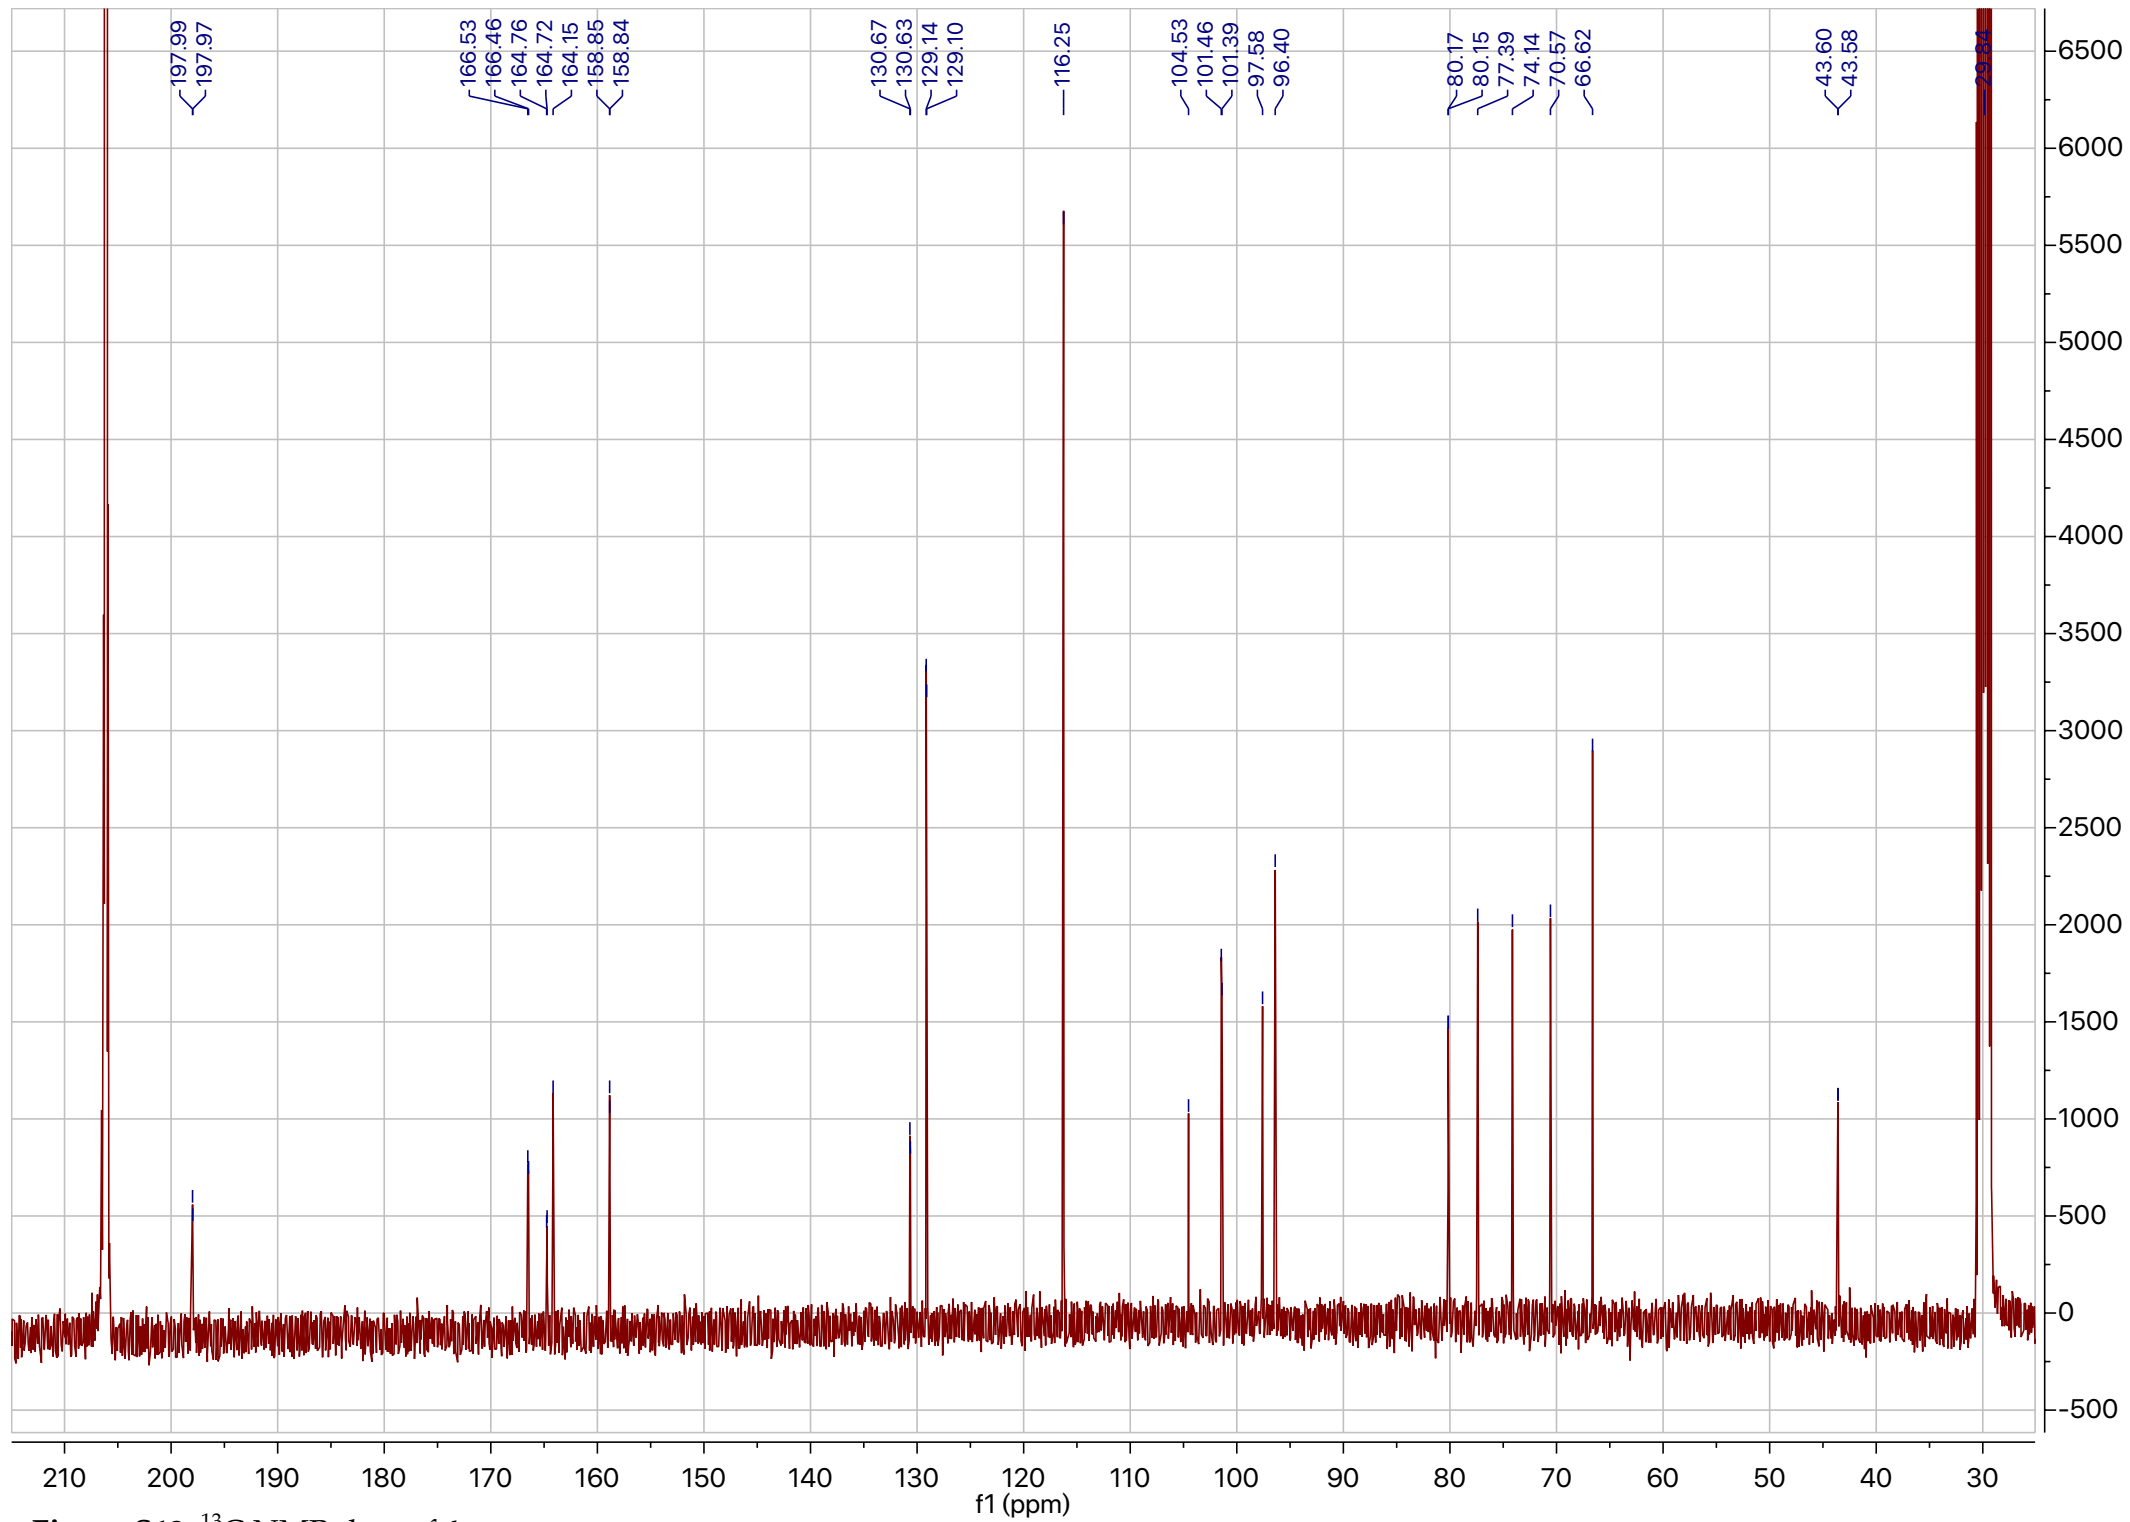

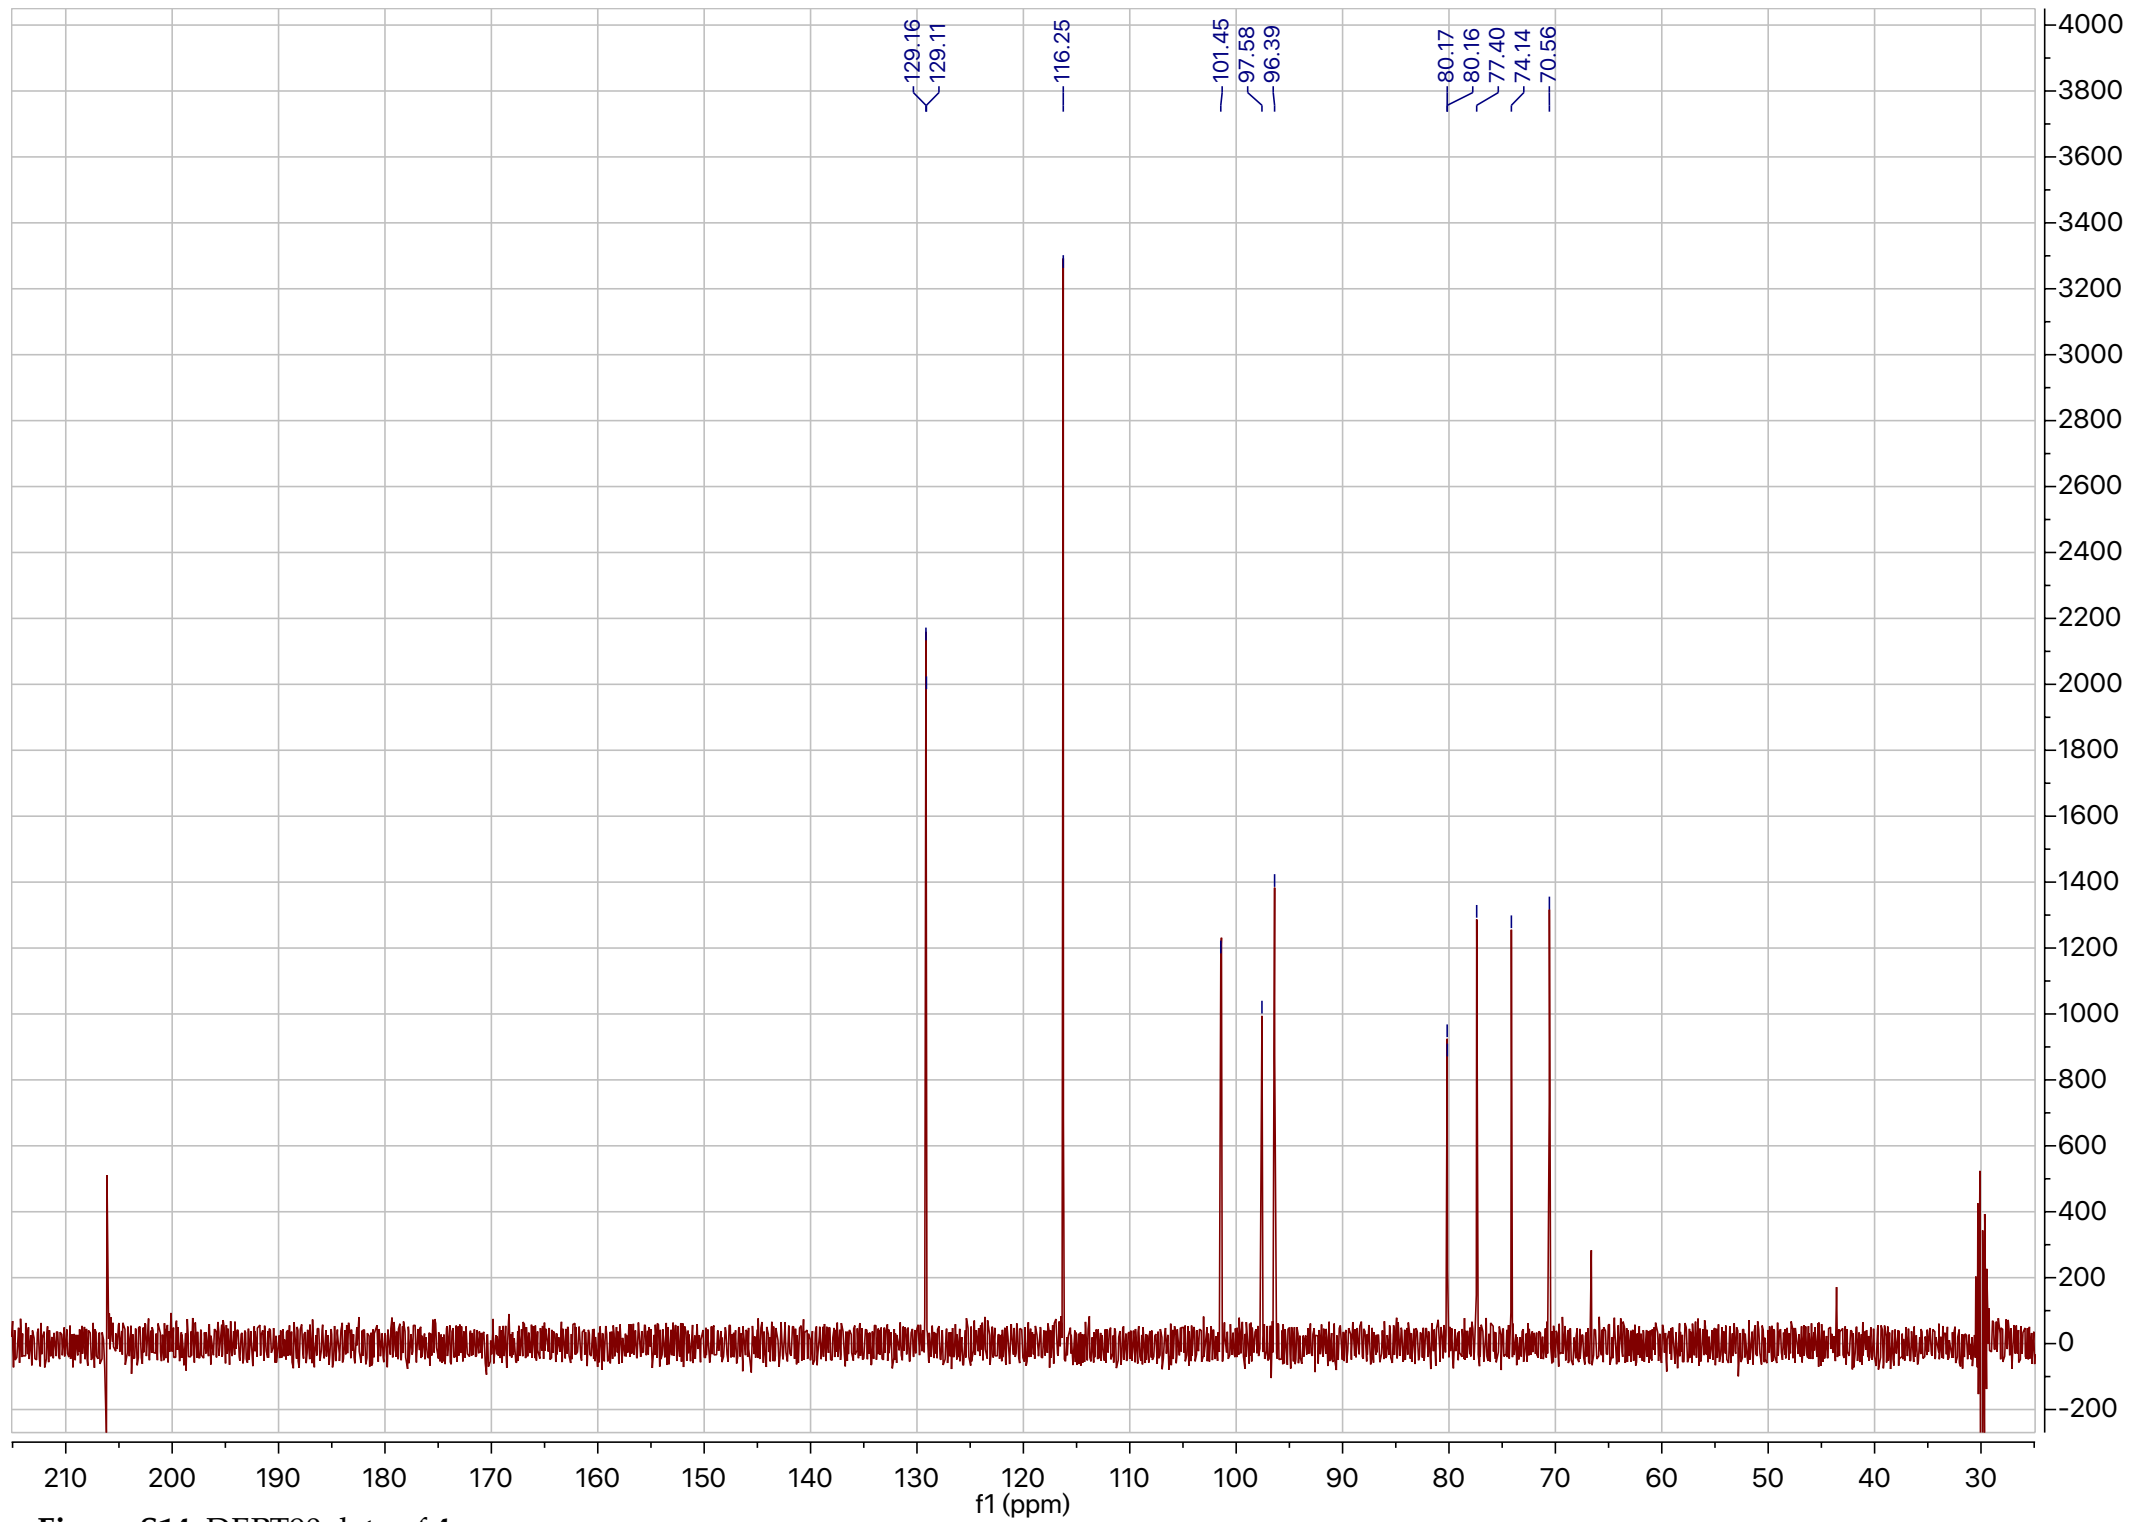

Figure S14. DEPT90 data of 4.

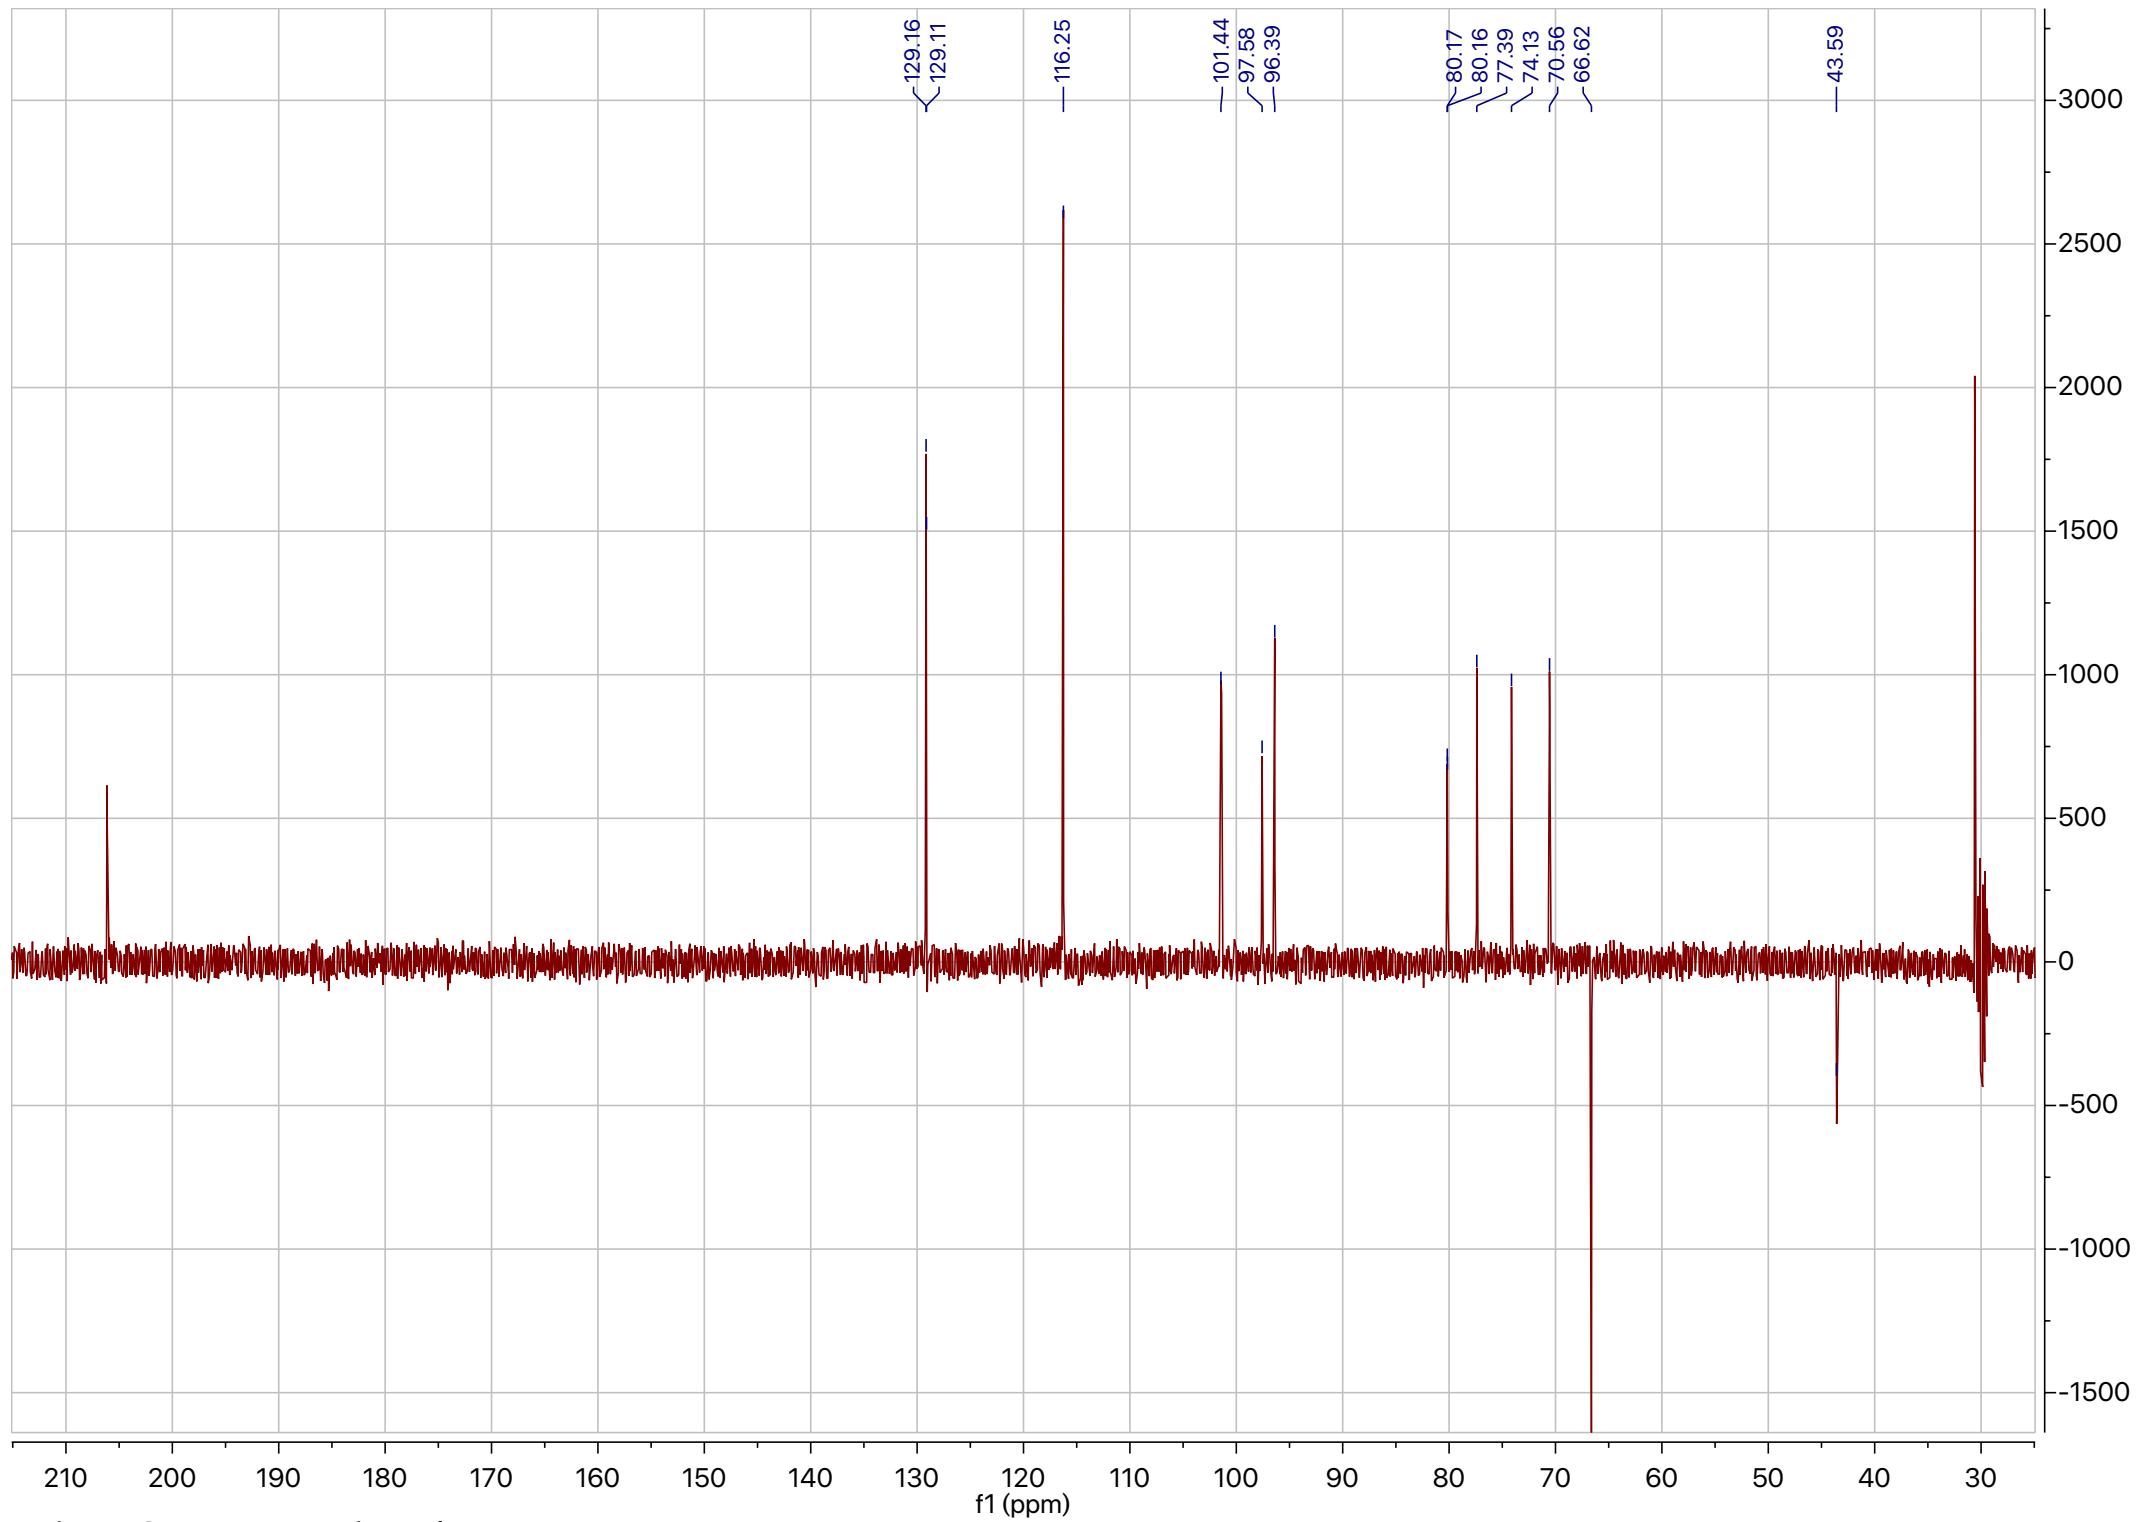

Figure S15. DEPT135 data of 4.



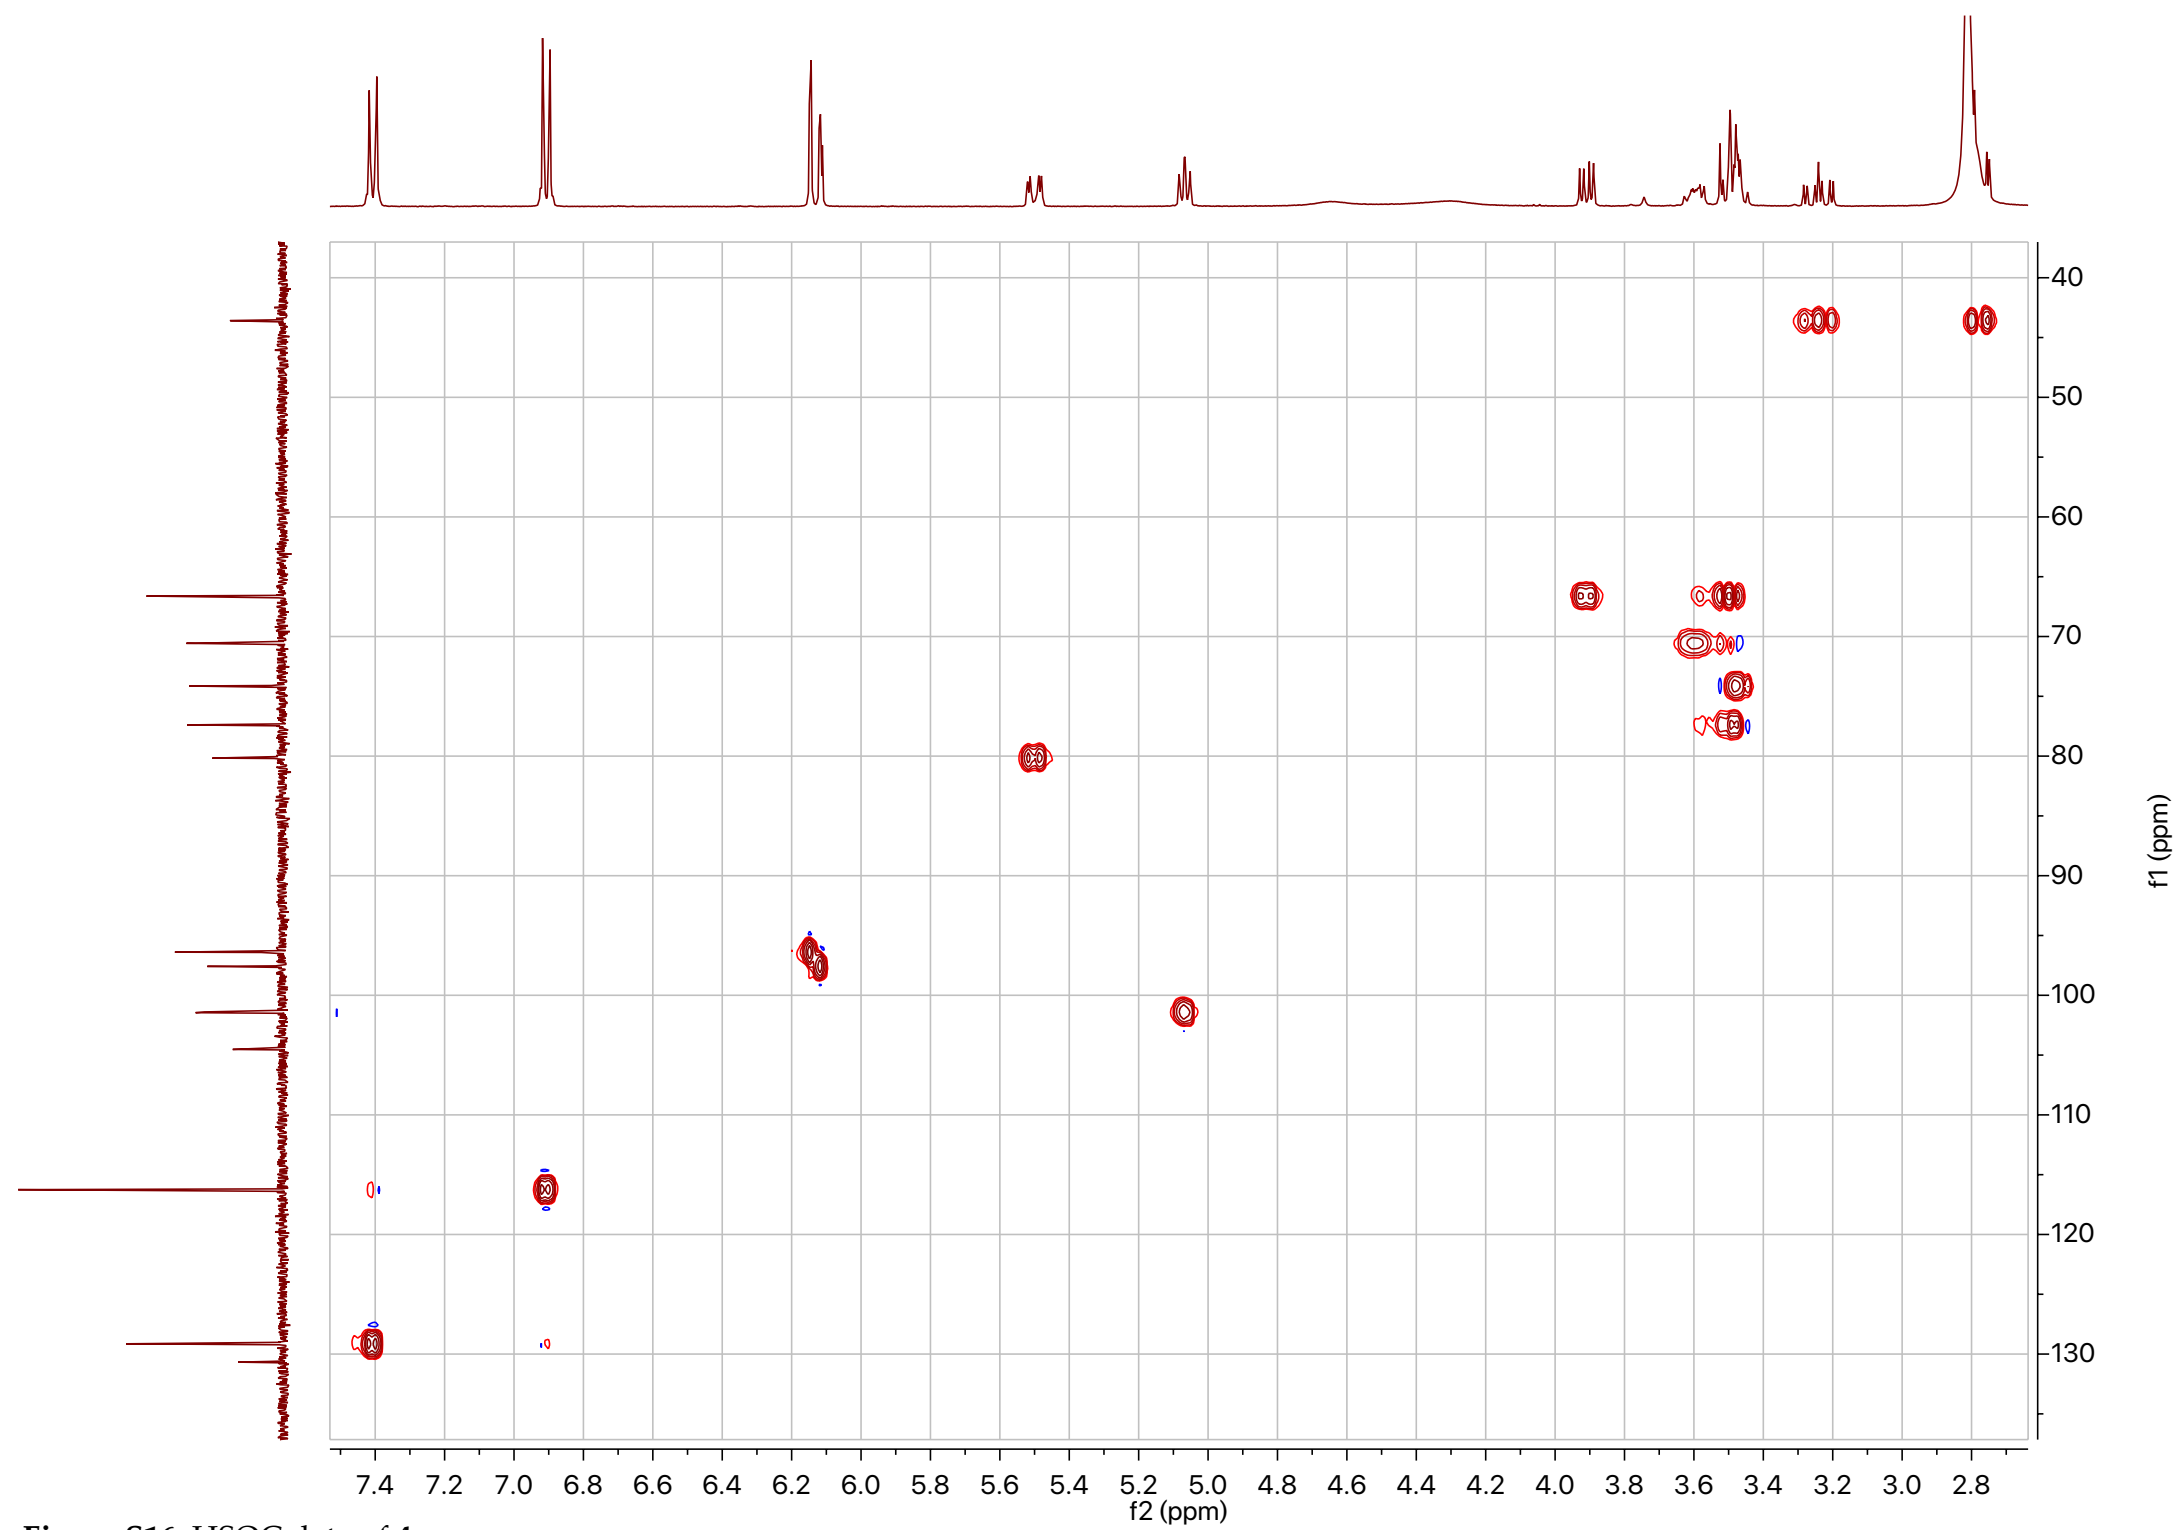

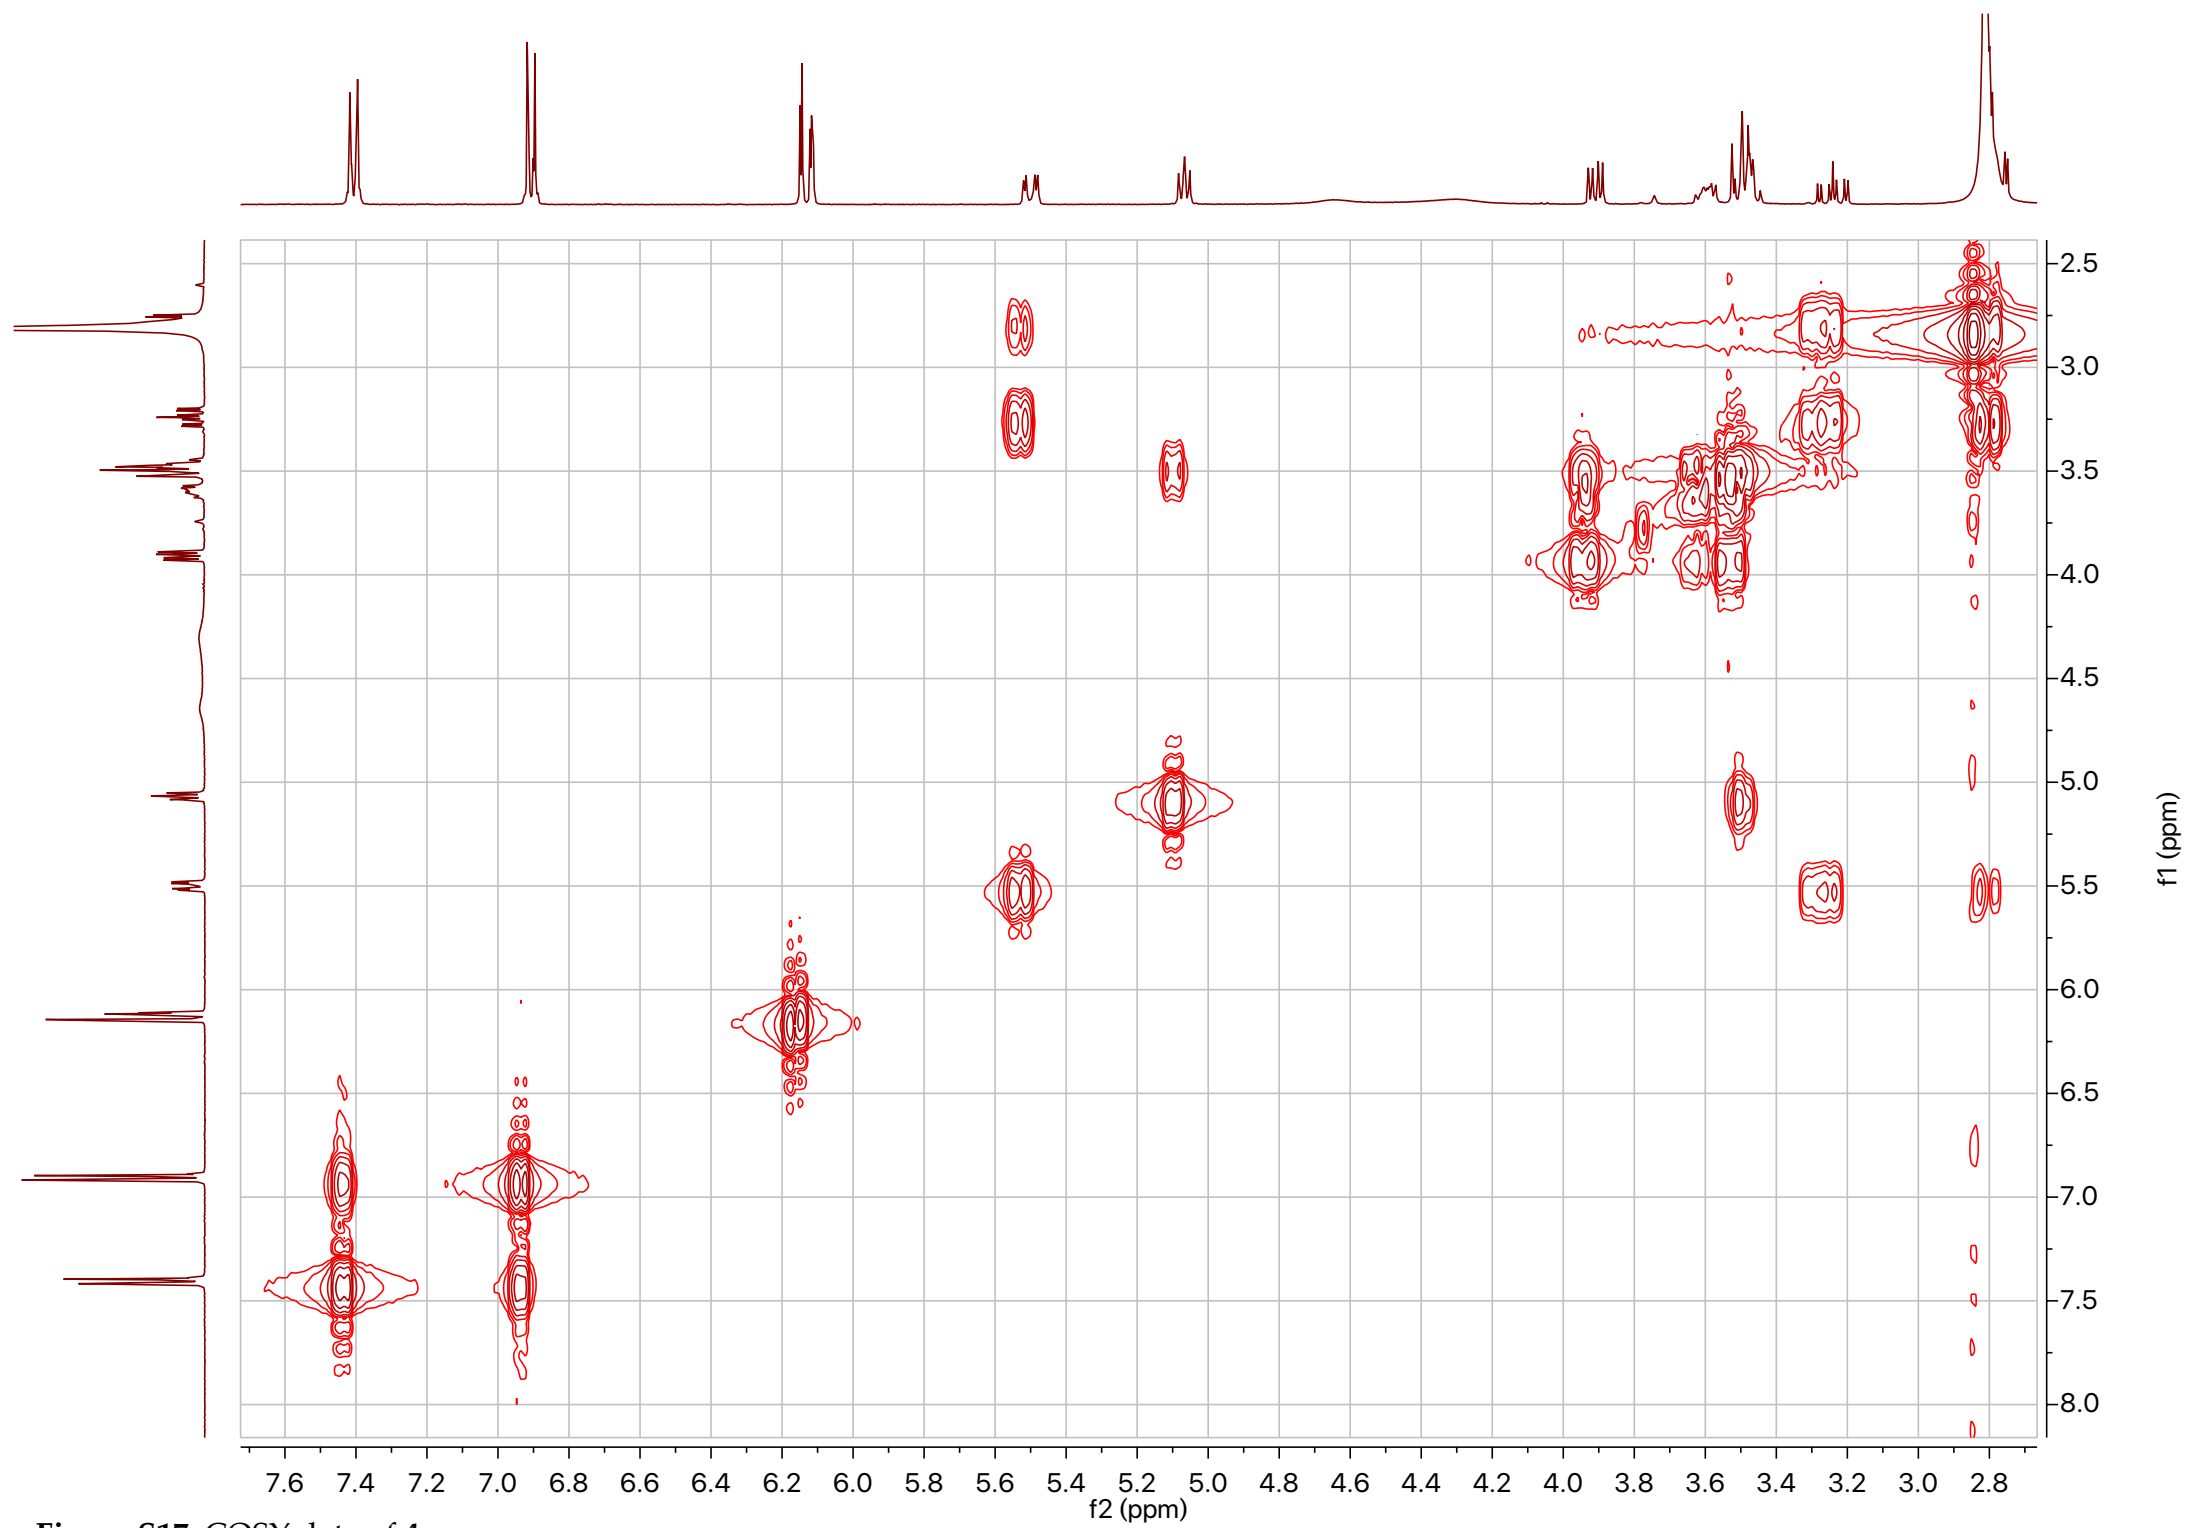

Figure S17. COSY data of 4.

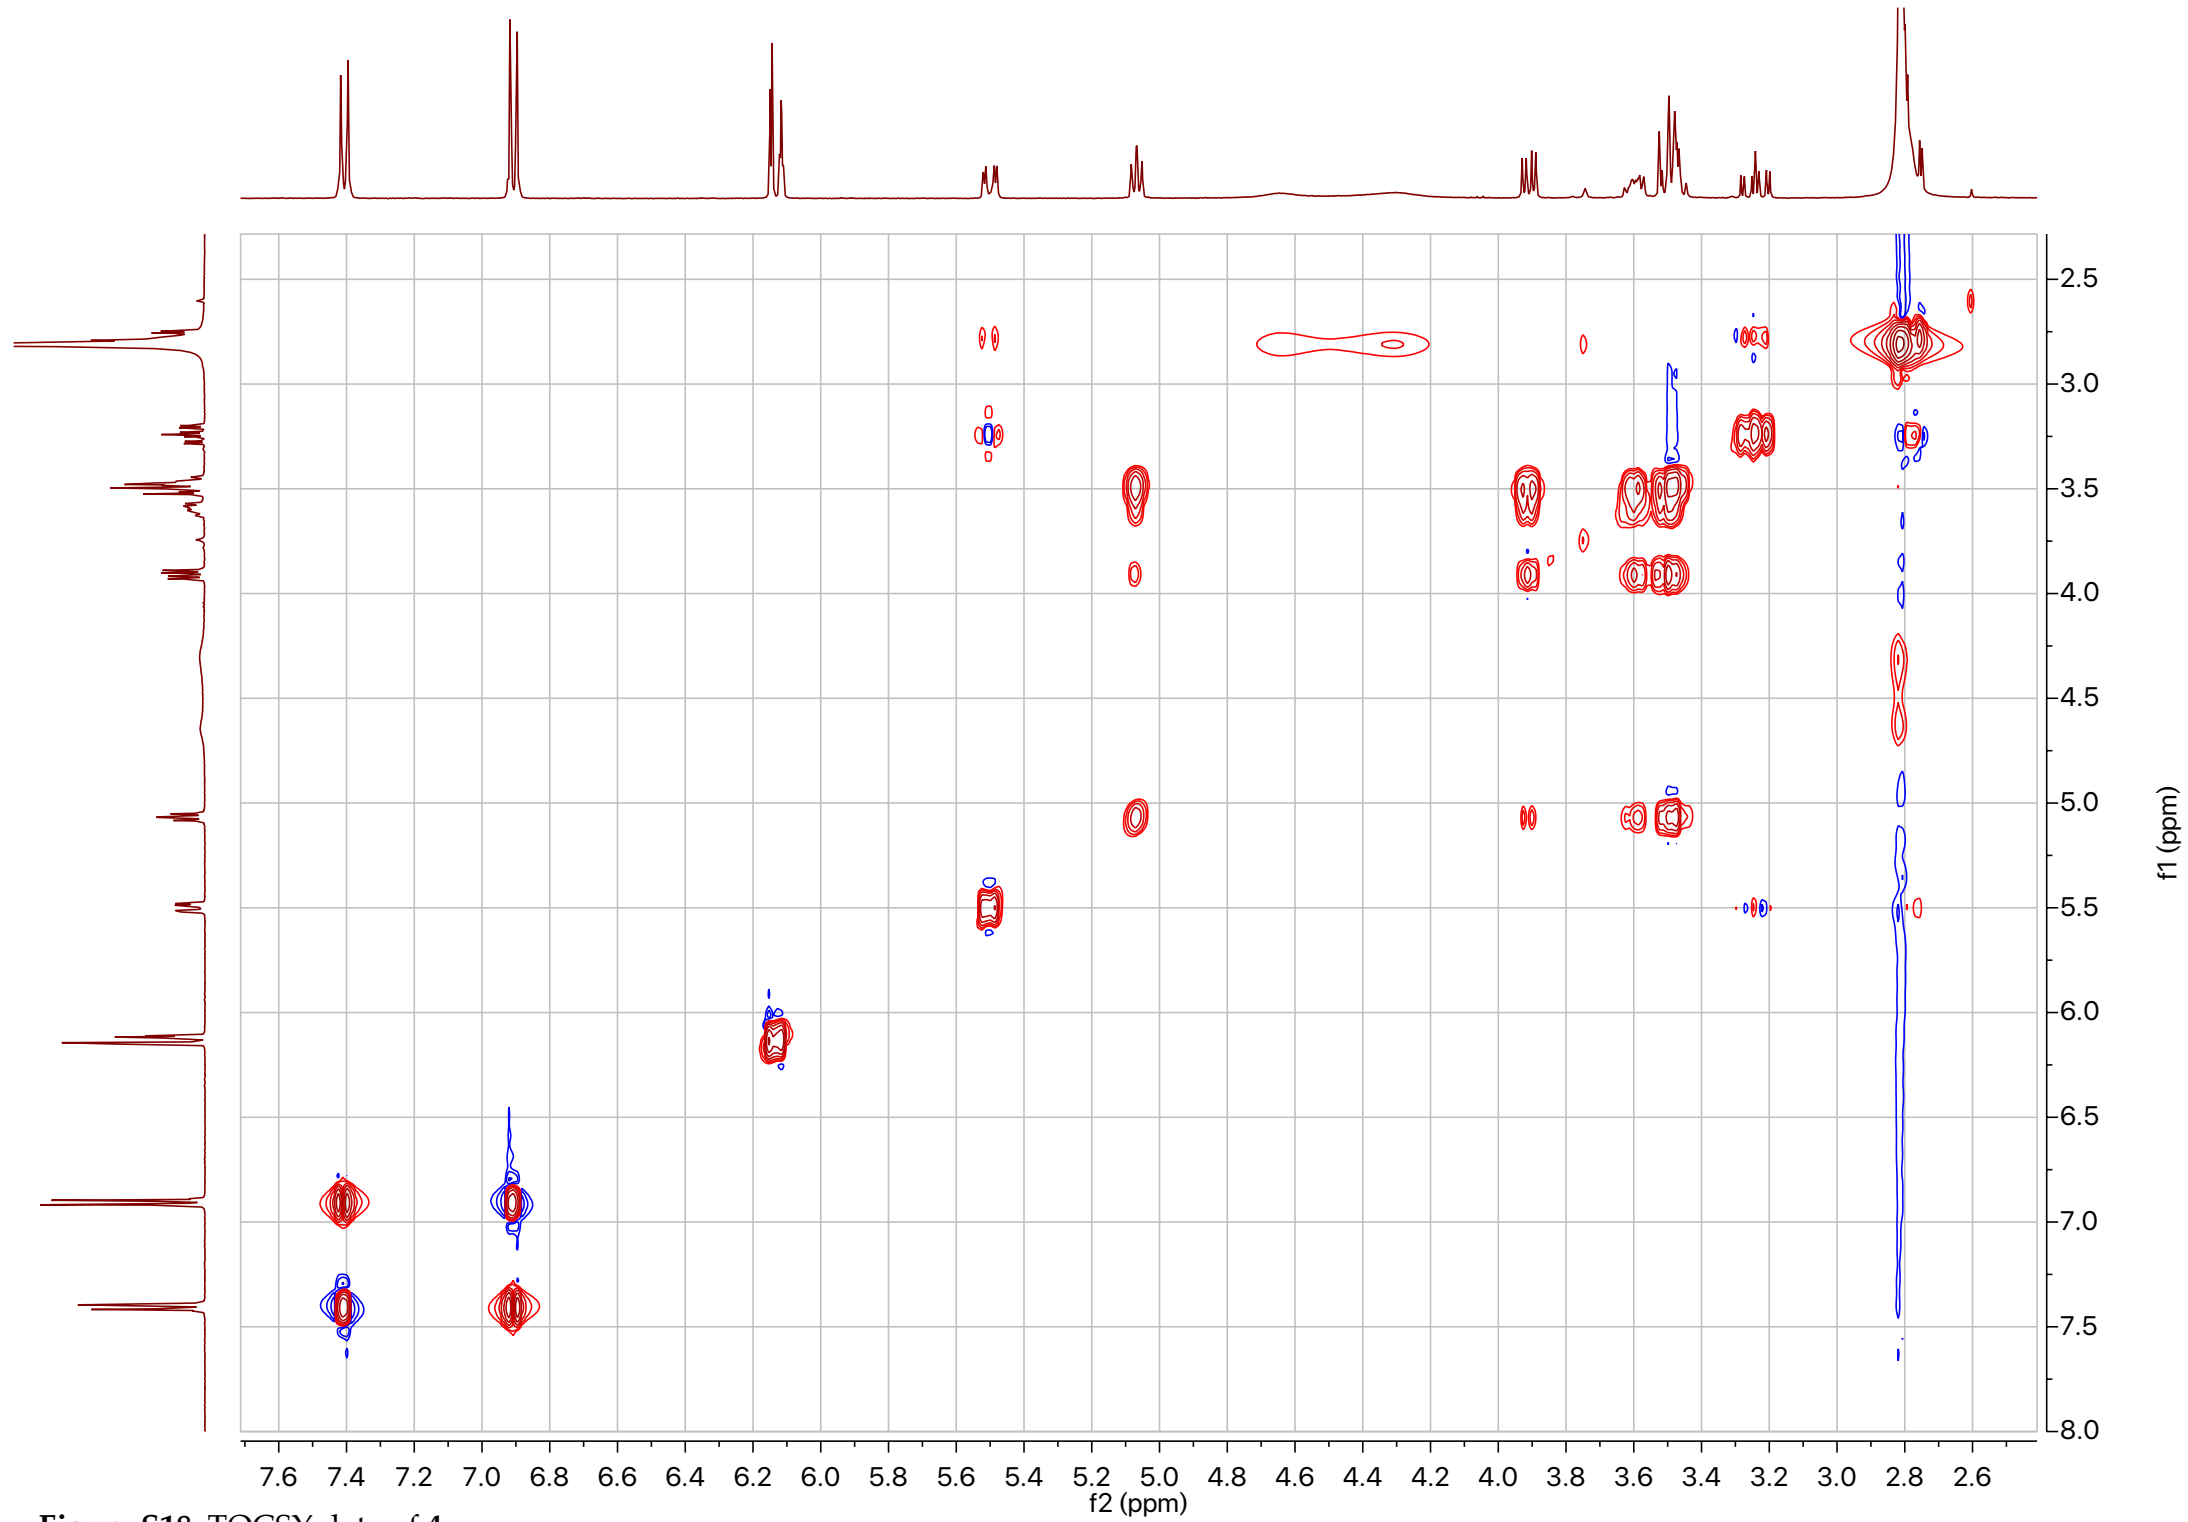

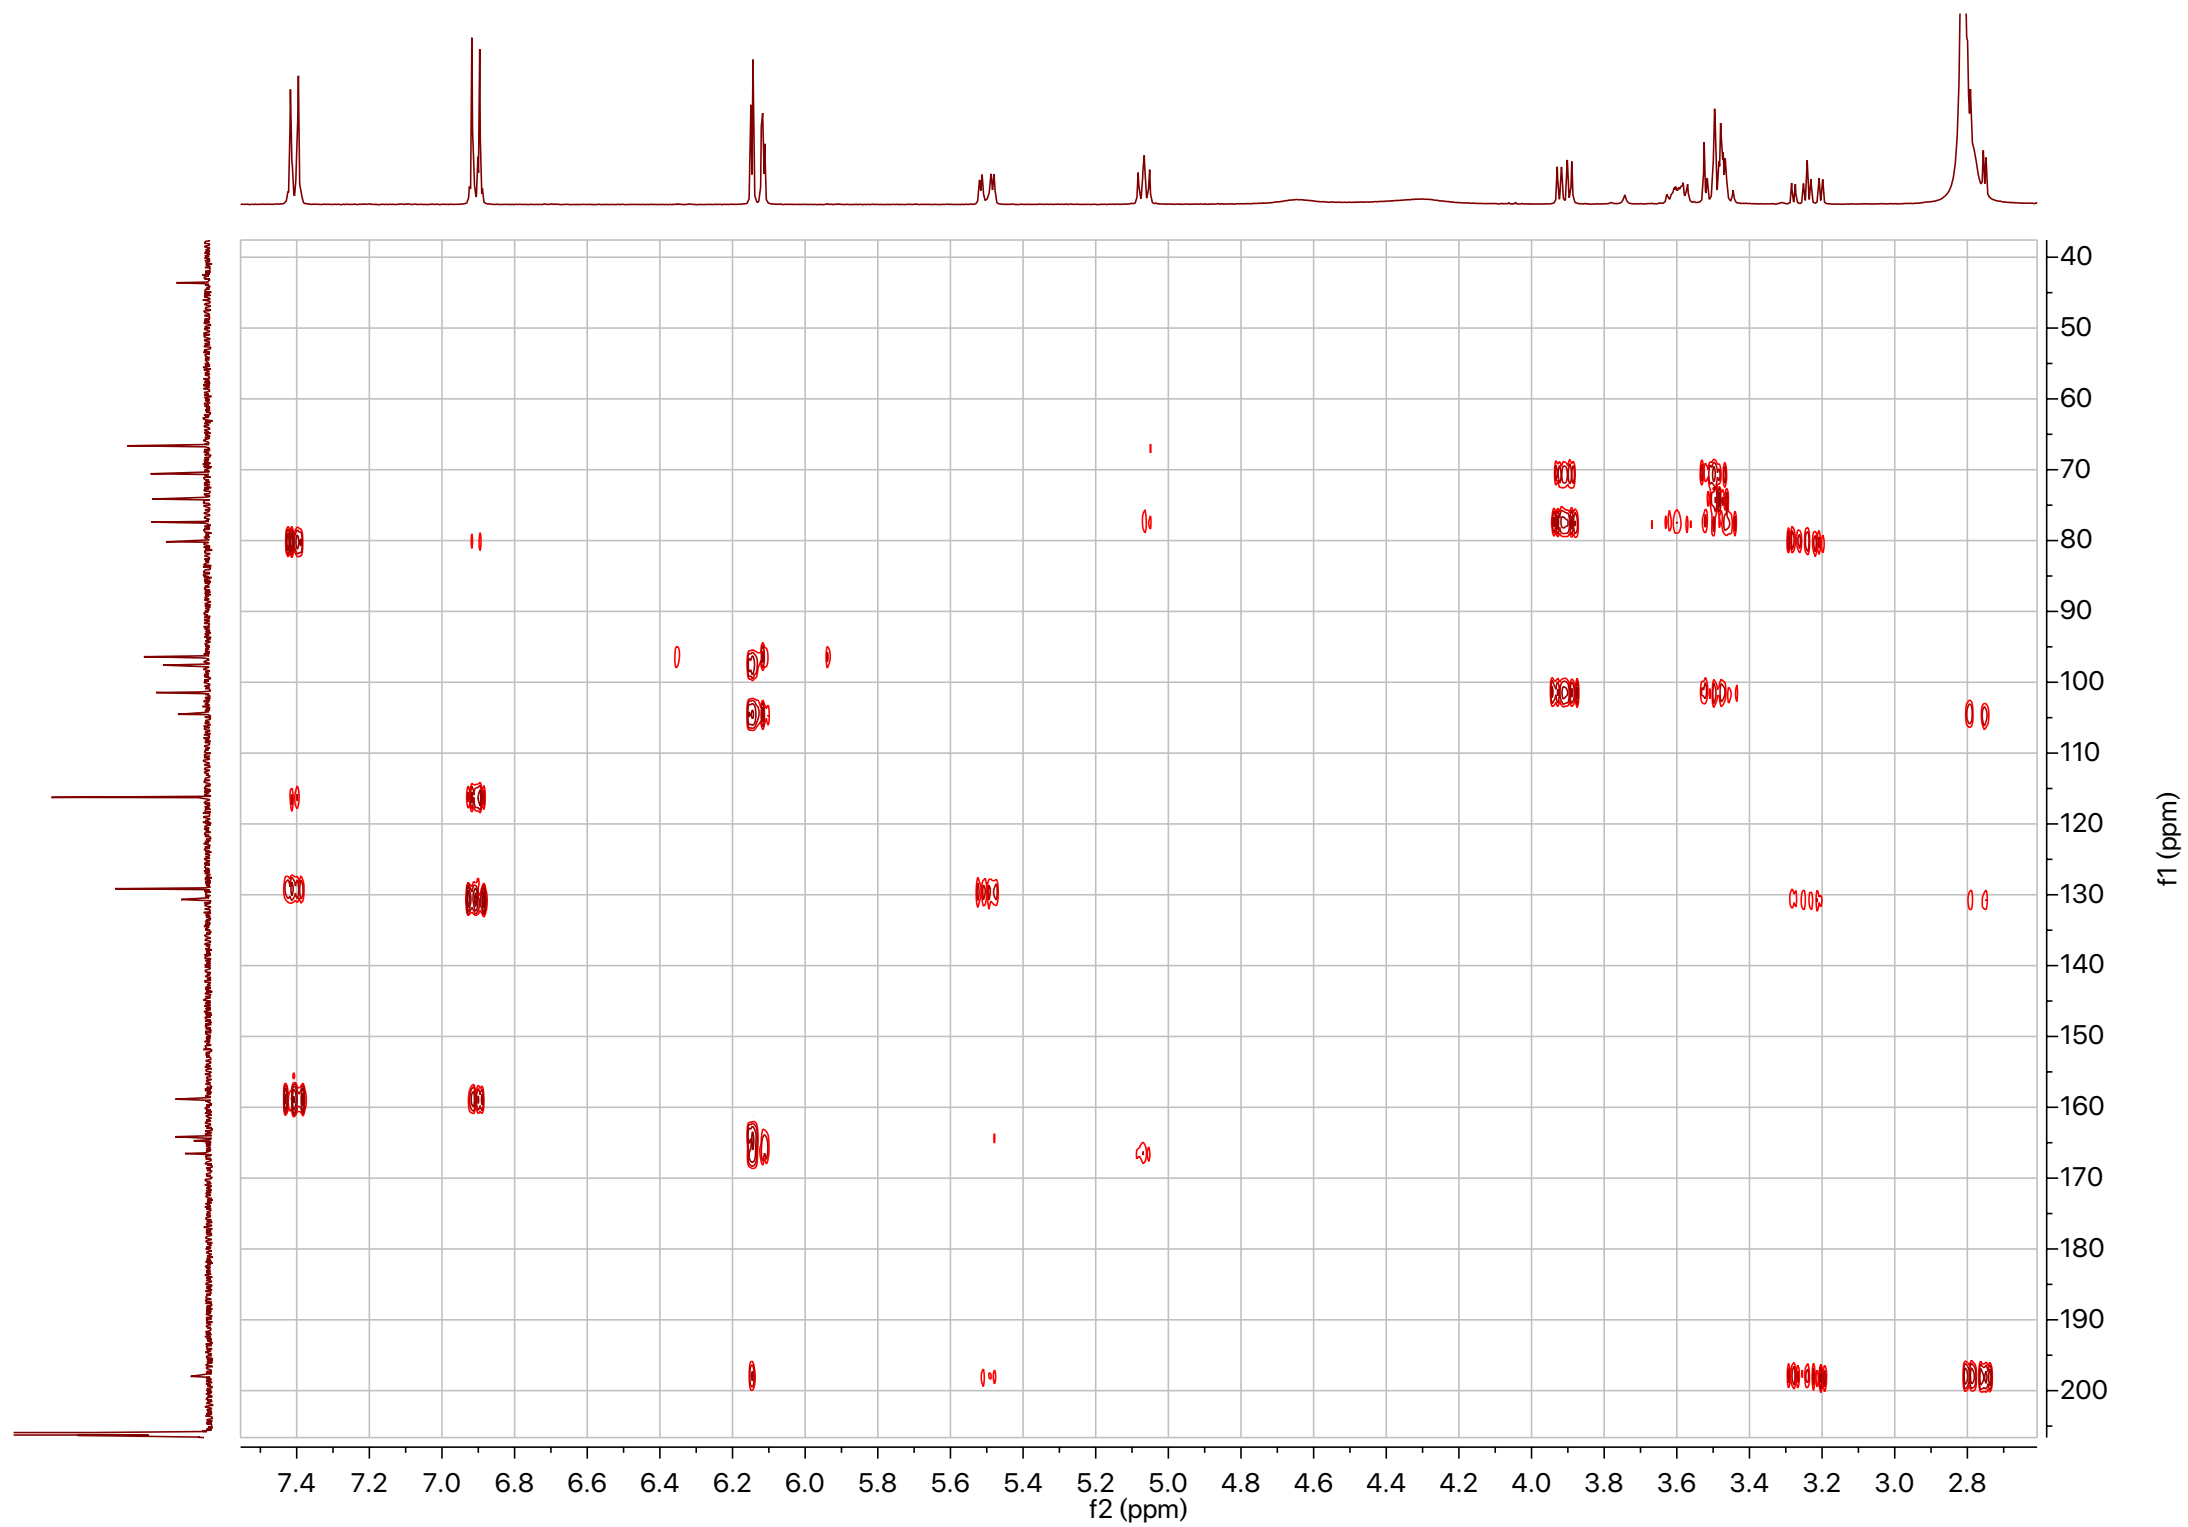

Figure S19. HMBC data of 4.
